1 **TITLE**

2 **Accumulation of dihydrosphingolipids and neutral lipids is related to**  
3 **steatosis and fibrosis damage in human and animal models of non-**  
4 **alcoholic fatty liver disease**

5

6 **RUNNING TITLE**

7 **Dihydrospingolipids are accumulated in NAFLD**

8

9 **AUTHORS**

10 Bohdan Babiy (1), Bruno Ramos-Molina (2), Luis Ocaña (5), Silvia Sacristán (3), Diego Burgos-  
11 Santamaría (4), Javier Martínez-Botas (3,6), Gemma Villa-Turégano (3), Rebeca Busto (3,6), Cristian  
12 Perna (7), M. Dolores Frutos (8), Agustín Albillos (4,9), Óscar Pastor (1,6)\*.

13

14 **AFFILIATIONS**

15

16 (1) Servicio de Bioquímica Clínica, UCA-CCM, HU Ramón y Cajal-IRYCIS, Madrid, Spain.

17 (2) Instituto Murciano de Investigación Biosanitaria (IMIB-Arrixaca), Murcia, Spain.

18 (3) Servicio de Bioquímica-Investigación, HU Ramón y Cajal-IRYCIS, Madrid, Spain.

19 (4) Servicio de Gastroenterología, HU Ramón y Cajal-IRYCIS, Madrid, Spain.

20 (5) Servicio de Cirugía General. HCU Virgen de la Victoria. Málaga, Spain.

21 (6) CIBER de Fisiología de la Obesidad y Nutrición (CIBEROBN), ISCIII, Spain.

22 (7) Servicio de Anatomía Patológica. HU Ramón y Cajal-IRYCIS, Madrid, Spain.

23 (8) Departamento de Cirugía General y Aparato Digestivo, HU Virgen de la Arrixaca, Murcia,  
24 Spain.

25 (9) CIBER de Enfermedades Hepáticas y Digestivas (CIBEREHD), ISCIII, Spain.

26

27 **Corresponding author**

28 Óscar Pastor Rojo,

29 Servicio de Bioquímica Clínica, Hospital Universitario Ramón y Cajal, Ctra. de Colmenar km 9, E-  
30 28034, Madrid, Spain.

31 Phone/fax: 00(34)913368950 / 00(34)913368058.

32 email: [oscar.pastor@salud.madrid.org](mailto:oscar.pastor@salud.madrid.org)

NOTE: This preprint reports new research that has not been certified by peer review and should not be used to guide clinical practice.

33 ORCID ID: <https://orcid.org/0000-0002-4368-433X>

34 **Key words**

35 NAFLD, MAFLD, NASH, lipidomics, sphingolipids, ceramides, dihydroceramides.

36 **Financial support**

37 This work was supported by grants from the Instituto de Salud Carlos III, Spain (PI18/01152,  
38 PI21/01173 & and PI20/00505), the Ministerio de Ciencia e Innovación, Spain (RTI2018-098113-  
39 B-I00, Plan Estatal de Investigación Científica y Técnica y de Innovación 2017-2020) and CIBER  
40 de Fisiopatología de la Obesidad y Nutrición, CIBEROBN, (OBN-18PI032018); all the grants co-  
41 financed by the European Development Regional Fund (ERDF, "*A way to make Europe*"). CIBER  
42 de Fisiopatología de la Obesidad y Nutrición is an initiative of ISCIII. B.B. is supported by pre-  
43 doctoral contracts (PEJD-2017-PRE/BMD-4142 and PEJD-2019-PRE/BMD-15962) of the  
44 Comunidad Autónoma de Madrid (CAM). R.B. and J.M-B. is a researcher from FIBio-HRC  
45 supported by Consejería de Sanidad (CAM). BR-M was supported by the "Miguel Servet Type I"  
46 program (CP19/00098, ISCIII, Spain; co-funded by the Fondo Europeo de Desarrollo Regional-  
47 FEDER).

48 **Author's contribution**

49 Babiyy B. (BB), Pastor O. (PO), Sacristán S. (SS), and Busto R. (BR), experiments on animals.  
50 Ramos-Molina, B (RMB), María Dolores Frutos (MDF), Ocaña L. (OL), Burgos-Santamaría D.  
51 (BD) and Albillos A. (AA), recruitment of patients. Perna C. (PC) and SS histology and  
52 immunohistochemistry. PC and PO scoring of patient and mouse liver biopsies. BB, PO and Villa-  
53 Turégano G (VTG), lipidomics, biochemistry assays, protein expression. Botas-Martínez J. (BMJ)  
54 gene expression. PO conceived the study. PO, RMB, LO, AA designed and supervised the study.  
55 PO & BB analysed, curated the data and generated the figures. PO wrote the manuscript. All  
56 authors read the manuscript and provided feedback.

57 **Conflicts of interest**

58 The authors declare that they have no conflicts of interest with the contents of this article.

59  
60  
61  
62  
63  
64  
65  
66  
67  
68  
69  
70  
71  
72  
73  
74  
75  
76  
77  
78  
79  
80  
81  
82  
83  
84  
85

## Abbreviations

**A**—Activity; **α-SMA**—Aortic smooth muscle actin (also named ACTA2); **ACer**— 1-o-Acylceramides ; **AUC**—Area under the curves; **BMI**—Body mass index; **BW**—Body weight; **CCl<sub>4</sub>**—Carbon tetrachloride; **CE**—Cholesteryl esters; **Cer**—Ceramide; **Cers**—Ceramide synthase; **CK18**—Apoptosis-associated caspase-cleaved keratin-18; **COL1A1**—Collagen alpha-1(I) chain ; **dhCer**—Dihydroceramides; **dhHexCer**—Dihydrohexosylceramide; **dhSM**—Dihydrosphingomyelin; **ELF**—Enhanced liver fibrosis score; **F**—Fibrosis; **FA**—Fatty acid; **FFA**—Free fatty acids; **FIB-4**—Fibrosis-4 index; **HA**—Hyaluronic acid; **hCLS**—Hepatic crown-like structures; **HDLc**—HDL cholesterol ; **HexCer**—Hexosylceramide; **HFD**—High-fat diet; **HOMA-IR**—Homeostatic model assessment for insulin resistance; **HSCs**—Hepatic stellate cells ; **HSP90**—Heat shock protein 90; **LW**—Liver weight; **MAFLD**—Metabolic associated fatty liver disease; **NAFL**—Non-alcoholic fatty liver; **NAFLD**—Non-alcoholic fatty liver disease; **NASH**—Non-alcoholic steatohepatitis; **NASHF**—NASH-fibrosis; **NFS**—NAFLD fibrosis score; **OGTT**—Oral glucose tolerance test; **PLIN2**—Perilipin-2; **PNIIP**—Procollagen III aminoterminal peptide; **S**—Steatosis; **SM**—Sphingomyelin; **SREBP1c**—Sterol regulatory element binding factor-1c; **T2DM**—Type II diabetes mellitus; **TG**—Triglycerides; **TIMP1**—Tissue inhibitor of metalloproteinase-1; **VLCFA**—Very-long chain fatty acids.

**Word Count:** 5883 (abstract and references not included)

**Figures:** 6

**Tables:** 2

86 **LAY SUMMARY (63 words)**

87       Accumulation of triglyceride and cholesteryl ester lipids is the hallmark of non-alcoholic fatty  
88 liver disease. Using lipidomics, we examined the role of significantly less abundant but potentially  
89 harmful dihydrosphingolipids in NAFLD progression. Our results demonstrate that *de novo*  
90 dihydrosphingolipid synthesis is an early event in NAFLD and the concentrations of these lipids are  
91 correlated with histological severity in both mouse and human disease.

92

93 **HIGHLIGHTS (58 words)**

- 94 • Neutral lipids and dihydrosphingolipids accumulate in liver in correlation with the histological  
95 severity of NAFLD in both mice and humans.
- 96 • The ceramide pathway is stimulated to alleviate the free fatty acid excess in liver of NAFLD  
97 models.
- 98 • Appearance of significant fibrosis is associated with reduced concentrations of neutral lipids but  
99 not dihydrosphingolipids in a mouse model of NAFLD.

100

101

102

103

104 **ABSTRACT (280 words)**

105 Background: Dihydroshingolipids are lipid molecules biosynthetically related to ceramides.  
106 An increase in ceramides is associated with enhanced fat storage in the liver and inhibition of their  
107 synthesis is reported to prevent the appearance of steatosis in animal models. However, the precise  
108 association of dihydroshingolipids with non-alcoholic fatty liver disease (NAFLD) is yet to be  
109 established. We employed a diet-induced NAFLD mouse model to study the association between  
110 this class of compounds and disease progression.

111 Methods: Mice were fed a high-fat diet enriched in cholesterol and supplemented with  
112 glucose and fructose up to 40 weeks. A mouse subgroup was treated with carbon tetrachloride to  
113 accelerate fibrosis development. Animals were sacrificed at different time-points to reproduce the  
114 full spectrum of histological damage found in human disease, including steatosis (NAFL) and  
115 steatohepatitis (NASH) with and without significant fibrosis. Blood and liver tissue samples were  
116 obtained from patients (n=195) whose NAFLD severity was assessed histologically. Lipidomic  
117 analysis was performed using liquid chromatography-tandem mass spectrometry.

118 Results: Triglyceride, cholesterol ester and dihydroshingolipid levels were increased in the  
119 liver of model mice in association with the degree of steatosis. Dihydroceramide concentrations  
120 increased with the histological severity of the disease in liver samples of mice ( $0.024 \pm 0.003$  vs  
121  $0.049 \pm 0.005$ , non-NAFLD vs NASH-fibrosis,  $p < 0.0001$ ) and patients ( $0.105 \pm 0.011$  vs  $0.165 \pm$   
122  $0.021$ ,  $p = 0.0221$ ). Several dihydroceramide and dihydroshingomyelin species were increased in  
123 plasma of NAFLD patients and correlated with accumulation of liver triglycerides.

124 Conclusions: Dihydroshingolipids accumulate in the liver in response to increased free fatty  
125 acid overload and are correlated with progressive histological damage in NAFLD. The increase in  
126 dihydroshingolipids is related to upregulation of hepatic expression of enzymes involved in *de*  
127 *novo* synthesis of ceramides.

## 128 INTRODUCTION

129 Non-alcoholic fatty liver disease NAFLD (also recently designated 'metabolic associated fatty  
130 liver disease', MAFLD) (1) is a growing health issue related to the epidemic of obesity and diabetes  
131 in developed countries. The incidence of cirrhosis associated with NAFLD has increased  
132 significantly over the years and is considered one of the main causes of chronic liver disease  
133 worldwide (2). However, the key drivers leading to predisposition to the development of  
134 steatohepatitis (NASH) and fibrosis, the main factors associated with poor outcomes, are currently  
135 unknown (3, 4). The lipotoxicity hypothesis proposes that in the early phases of NAFLD (simple  
136 steatosis or NAFL), neutral lipids, such as triglycerides (TG) and cholesterol esters (CE),  
137 accumulate in the liver in response to the influx of free fatty acids (FFA) from adipose tissue, which  
138 corresponds with the appearance of peripheral and hepatic insulin resistance (5). Moreover, FFAs  
139 trigger the synthesis of the less abundant but potentially harmful ceramides (Cer), dihydroceramides  
140 (dhCer), and other biosynthetically related sphingolipids and dihydrosphingolipids (**Suppl Fig. 1**).  
141 The majority of evidence on the involvement of sphingolipids and dihydrosphingolipids  
142 (collectively termed (dihydro)sphingolipids) in NAFLD has been obtained from knockout studies  
143 on animals (reviewed in (6, 7)). Earlier studies clearly demonstrate that increase in liver Cer is  
144 associated with enhanced FFA uptake, TG storage and impaired glucose utilization in the liver,  
145 none of which could be replicated with dhCer (8). Hence, strategies to prevent the increase in liver  
146 Cer using inhibitors of serine palmitoyltransferase (*Sptlc*) such as myriocin (9) or blocking the  
147 conversion of dhCer to Cer with dihydroceramide desaturase inhibitor (*Degs1*) have been effective  
148 in avoiding early steatosis in animal models (10, 11).

149 Limited studies to date have examined the relationship between (dihydro)sphingolipid  
150 accumulation in diet-induced mouse models of NAFLD. Kim et al. (10) reported an increase in the  
151 concentration of Cer 34:1 (C16-Cer) in response to a high-fat diet (HFD) enriched in palmitic acid  
152 (FA 16:0) at 24 weeks, coincident with increased expression of ceramide synthase (*Cers6*) and  
153 associated with higher lipogenesis rates mediated by the nuclear factor SREBP1c (10). In keeping

154 with this finding, the increase in C16-Cer promoted steatosis in the liver, whereas ceramides  
155 containing very-long-chain fatty acids (VLCFA) synthesized by *Cers2* isoenzymes (such as Cer  
156 40:1 and Cer 42:1) protected against early NAFL (12). Short-term administration of carbon  
157 tetrachloride (CCl<sub>4</sub>), a toxic agent inducing fibrosis progression in mice fed a normal diet, is  
158 reported to enhance liver Cer (13). However, studies focusing on the association of  
159 (dihydro)sphingolipids with disease progression to NASH and significant stages of fibrosis (NASH-  
160 fibrosis) in animal models are lacking.

161 Similarly, incomplete results on the relationship between (dihydro)sphingolipids and NAFLD  
162 progression have been obtained in human studies. A number of earlier investigations reported  
163 increased Cer levels in plasma and liver NAFL and NASH patients (14, 15), while recently  
164 publications specifically document an increase in dihydrosphingolipids, – dihydroceramide (dhCer)  
165 and dihydrosphingomyelin (dhSM) – in plasma (16, 17) and liver (18, 19). The reliability of  
166 conclusions from studies on the involvement of (dihydro)sphingolipids in NAFLD is hampered by  
167 the lack of histological representation of the full spectrum of the disease and limited coverage of the  
168 dihydrosphingolipid species.

169 Cross-examination of the roles of sphingolipids and dihydrosphingolipids in relation to the  
170 histological course of disease is necessary to understand the involvement of this class of lipids in  
171 pathogenesis, which may be of relevance in establishing optimal candidate molecular targets of the  
172 ceramide pathway to inhibit progression. The main aim of the current study was to determine the  
173 potential associations of (dihydro)sphingolipid changes with histological grading and staging in  
174 NAFLD. To address this issue, we compared findings from a diet-induced mouse model of NAFLD  
175 and human patients. Our collective results showed that dihydrosphingolipids are more closely  
176 related with histological damage than sphingolipids, especially steatosis and therefore neutral lipid  
177 accumulation, in both mice and humans.

178

179 **METHODS**

180 A full description of the methods is provided in the **Supplementary Methods section**.

181 *Animal housing conditions*

182 Mice were housed in the animal facility of Hospital Universitario Ramón y Cajal (Num. Reg:  
183 ES 280790000092) in a temperature-controlled room under a 12 light/dark cycle with *ad libitum*  
184 access to food and water. All interventions were performed during the light cycle in accordance  
185 with legislation in Spain (RD 53/2013) and the European Directive (2010/63/EU) and approved by  
186 the Ethics Committee of the Ramón y Cajal Hospital, Madrid (ES-280790002001).

187 *Diets and treatments*

188 Six week-old C57BL/6J male mice received either standard rodent chow or a high-fat diet  
189 (HFD) enriched with cholesterol (1.25%) and a high sugar solution of fructose and glucose in  
190 drinking water up to 40 weeks. At 22 weeks, a subset of animals received a weekly intraperitoneal  
191 injection of CCl<sub>4</sub> at a final dose of 0.2  $\mu$ L CCl<sub>4</sub>/gr of body weight for 6 and 10 weeks. Animals  
192 were sacrificed at predetermined time-points (**Suppl. Fig. 2**). Food was removed 6 h before death.  
193 Mice were anesthetized with sevoflurane (2% in oxygen flux at 1 L/min). Blood was drawn by  
194 cardiac puncture, the liver extracted, and plasma obtained after centrifugation (1900 g) for  
195 biochemistry assays. The median hepatic lobe was preserved in 10% buffered formalin for  
196 histological and immunohistochemical analyses.

197 *Patients*

198 We prospectively enrolled consecutive patients with obesity undergoing bariatric surgery at  
199 the two hospital centers (Hospital Clínico Universitario Virgen de la Victoria de Málaga and  
200 Hospital Universitario Virgen de la Arrixaca de Murcia, Spain). Inclusion criteria were age range of  
201 18–65 years and obesity of more than 5 years of duration with a body mass index (BMI)  $\geq 40$  kg/m<sup>2</sup>.



202 Additional patients in the plasma lipidomic cohort were recruited from the Gastroenterology  
203 Department of Hospital Ramón y Cajal for confirmatory NAFLD diagnosis, suspected based on the  
204 presence of steatosis upon abdominal ultrasound examination and/or unexplained aspartate  
205 aminotransferase (AST), alanine aminotransferase (ALT) or gamma-glutamyltransferases (GGT)  
206 elevation accompanied by type II diabetes mellitus (T2DM), obesity (BMI)  $\geq 35$  kg/m<sup>2</sup> and  
207 metabolic syndrome.

208 Exclusion criteria were set based on evidence of other causes of liver disease, including viral  
209 hepatitis, medication-related disorders, autoimmune disease, hepatocellular carcinoma,  
210 haemochromatosis, Wilson's disease, familial/genetic causes or a previous history of excessive  
211 alcohol use (>30 g daily for men and >20 g daily for women) or treatment with any drugs  
212 potentially causing steatosis, such as tamoxifen, amiodarone, and valproic acid (20). The study was  
213 performed in agreement with the Declaration of Helsinki according to local and national laws and  
214 approved by the Ethics and Clinical Research Committees of every center: "Predictive factors of  
215 histological lesions in patients with non-alcoholic fatty liver disease" (Hospital Universitario  
216 Ramón y Cajal, ref: EC 276-14), "Gut microbiota and related metabolites as potential biomarkers of  
217 resolution of non-alcoholic steatohepatitis and improvement of liver fibrosis after bariatric surgery"  
218 (Hospital Clínico Universitario Virgen de la Araixaca, ref: 2020-2-4-HCUVA) and "Metabolomic  
219 study in obese NAFLD/NASH patients subjected to bariatric surgery" (Hospital Clínico  
220 Universitario Virgen de la Victoria de Málaga, ref: S2200002).

### 221 *Histology of patient liver biopsies*

222 Intraoperative wedge liver biopsies from bariatric surgery patients at least 1 cm in depth were  
223 obtained. One section was snap-frozen and stored at -80°C for lipidomic analysis and the other was  
224 formalin-fixed and paraffin-embedded for histological assessment. Percutaneous or transjugular  
225 liver biopsy specimens (1 mm in diameter and 1.5 mm in length) were obtained from patients  
226 subjected to non-bariatric surgery included in the plasma lipidomic cohort. The minimal set of

227 staining procedures included hematoxylin and eosin (H&E), Masson trichrome, Periodic acid–  
228 Schiff (PAS), Perls and reticulin staining. All biopsies were reviewed and scored by trained liver  
229 pathologists from the recruitment centers (**Supplementary methods**).

### 230 *Histology of mouse liver biopsies*

231 Mouse liver tissue sections were stained with H&E and picosirius red and evaluated in a  
232 blinded manner by an experienced pathologist (P.C). Histological scoring in mice was performed  
233 using the SAF (Steatosis, Activity and Fibrosis) classification system proposed by Bedossa (21)  
234 (**Supplementary methods**).

### 235 *Western blot*

236 Homogenized liver tissue extracts were diluted to 1 mg/mL in lysis buffer (described in  
237 **Supplementary methods**) and protein concentrations in the extracts assessed using the  
238 bicinchoninic acid assay. For measurement of expression, 40 µg protein was loaded onto 10% SDS  
239 gels for electrophoresis and transferred to nitrocellulose membranes. After blocking (0.1% solution  
240 of casein in TBS w/v), blots were incubated with primary antibodies for actin alpha 2/ $\alpha$ -smooth  
241 muscle actin (ACTA2/ $\alpha$ -SMA; dil 1:1000 v/v), perilipin 2 (PLIN2; dil 1:4000 v/v), sequestosome 1  
242 (p62; dil 1:4000 v/v), collagen type I Alpha 1 chain (Col1A1; dil 1:2000 v/v) and heat shock protein  
243 90 (HSP90; dil 1:2000 v/v), followed by secondary antibodies conjugated to IRDye 800 CW or  
244 IRDye 680 LT (LI-COR, Lincoln, NE, USA). Quantification of bands was performed via  
245 densitometry using the Odyssey Infrared Imaging System V.3.0 and normalized to the intensity of  
246 the loading control (HSP90).

### 247 *Real-time PCR gene expression*

248 Homogenized liver tissue was extracted using an RNeasy-Plus Universal Mini Kit and the  
249 QIAcube automated purification system (Qiagen, Maryland-USA) according to the manufacturer's  
250 instructions. Following validation, RNA (500 ng) was reverse-transcribed with random hexamers

251 using the PrimeScript RT reagent kit (Takara, California-USA). Real-time PCR amplification was  
252 performed on a LightCycler 480 II using the SYBR Green I Master kit (Roche, Basel-Switzerland)  
253 on 384-well plates. Data were analyzed using the relative quantification method described by Pfaffl  
254 (22), based on the mean values of three housekeeping genes (*18S ribosomal RNA [Rn18s]*,  
255 *cyclophilin B [Cypb]*, and *Human ribosomal protein large P0 [Rplp0]*) as invariant endogenous  
256 controls for each sample as described in **Supplementary methods**.

### 257 *Oral glucose tolerance test*

258 Oral glucose tolerance test (OGTT) was performed in mice after 5 h of fasting (23) . For this  
259 experiment, mice were administered an oral solution of glucose (0.5 g/mL) using a gavage needle (2  
260 g glucose/kg body weight). Blood glucose measurements were conducted on samples (obtained via  
261 tail nicking) at 0, 15, 30, 60, and 120 min with the aid of a glucometer (Performa-Accu-Chek.  
262 Roche, Basel-Switzerland).

### 263 *Blood biochemistry assays*

264 Glucose, AST, ALT, total cholesterol (Chol), total triacylglycerols (Trig), HDL cholesterol  
265 (HDLc), insulin, and other blood clinical chemistry measurements were performed using an  
266 Architect ci16000 system (Abbott Diagnostics, Illinois-USA). The glycated haemoglobin (HbA1c)  
267 level was analyzed using Hb9210 Premier equipment (A. Menarini Diagnostics, Florence-Italy).  
268 Free fatty acid (FFA) levels in plasma and liver tissue were measured using a specific ELISA kit  
269 (Elabscience, Houston-USA). Procollagen III aminoterminal peptide (PNIIP), Hyaluronic acid  
270 (HA) and metalloproteinase inhibitor 1 (TIMP1) in plasma were analyzed on an ADVIA-Centaur  
271 XPT system (Siemens Healthineers, Malvern-USA) and cytokeratin 18 (CK18) evaluated using an  
272 ELISA kit (PEVIVA, Stockholm-Sweden).

### 273 *Lipidomic analyses of plasma and liver tissue samples*

274 Lipid species were analyzed using targeted liquid chromatography coupled to tandem mass  
275 spectrometry following a previously described validated workflow (24). Lipids from homogenized  
276 liver tissue (equivalent to 250 µg of total protein) or plasma (50 µL) were extracted following  
277 Folch's methodology (25). A mixture (10 µL) containing one internal standard per lipid class was  
278 added to all samples before lipid extraction for molar quantification. Analysis of several batches  
279 was necessary for processing on different days. To reduce analytical variability for every batch, we  
280 analyzed a self-validated plasma calibrator and three different levels of quality controls. Using this  
281 approach, the analytical within-day and between-day relative standard deviations (RSDs) were kept  
282 below 20% for the 130 species of the 13 different lipid classes (**Suppl. Fig. 9**).

### 283 *Statistical analysis*

284 Statistical analyses were conducted using R software version 3.5.1 (<http://www.r-project.org>).  
285 One-way ANOVA comparisons for quantitative variables between more than two groups were  
286 conducted and in cases of significance, post-hoc paired comparisons performed using the Student's  
287 t-test. Comparison between qualitative variables was performed using the Chi-square ( $\chi^2$ ) test. P-  
288 values of less than 0.05 were considered significant. Correlations between quantitative variables  
289 were examined using Pearson's correlation coefficient. Hierarchical cluster analysis was performed  
290 with the aid of k-means algorithm using euclidean distances.

### 291 *Data availability*

292 The final datasets used for manuscript preparation are available at Zenodo repository  
293 (<https://doi.org/10.5281/zenodo.6122303>).

294

295

## 296 **RESULTS**

### 297 *Metabolic characterization of the NAFLD mouse model*

298 To establish the relationship between (dihydro)sphingolipid species and NAFLD, we initially  
299 examined the characteristics of a diet-induced mouse model of NAFLD (**Suppl. Fig. 2**). Mice were  
300 fed a HFD enriched in cholesterol, glucose and fructose for up to 40 weeks and ultimately sacrificed  
301 at different time points (22, 30 and 40 weeks) to trace disease progression from NAFL to NASH. A  
302 subset of animals was treated with CCl<sub>4</sub>, starting at 22 weeks, but kept under the same regime to  
303 accelerate progression to higher stages of fibrosis (F3-F4). Animals were sacrificed at 28 weeks (6  
304 injections of CCl<sub>4</sub>) and 32 weeks (10 injections of CCl<sub>4</sub>) for experimental purposes.

305 HFD feeding increased the weights of animals compared with control littermates (**Fig. 1A**).  
306 This increase corresponded to changes in liver weight and liver to body weight ratio (LW/BW)  
307 (**Fig. 1B, C**, respectively). Conversely, administration of CCl<sub>4</sub> induced a decrease in both weight  
308 and LW/BW. Transaminase levels in plasma (AST and ALT) were higher from 22 weeks onwards,  
309 with a more significant increase at 40 weeks (**Fig. 1D, E**). Administration of CCl<sub>4</sub> induced a  
310 decrease in transaminase levels compared to the HFD-fed group at 22 weeks. Total plasma  
311 cholesterol (Chol) and HDL-cholesterol (HDLc) were increased in HFD-fed animals (**Fig. 1F, H**).  
312 Surprisingly, plasma triglyceride levels were decreased in the HFD group (**Fig. 1G**). Plasma basal  
313 glucose concentrations (Glu) increased from 22 weeks of feeding, showing a decay at 40 weeks or  
314 after CCl<sub>4</sub> administration (**Fig. 1I**). This behavior was compatible with development of insulin  
315 resistance (IR) in HFD mice at 22 weeks and confirmed upon glucose challenge (**Fig. 1J, K**).  
316 Metabolically, the mouse model showed progressive body weight gain (obesity) accompanied by  
317 IR, dyslipidemia (hypercholesterolemia) and elevated levels of biomarkers of hepatocellular  
318 damage. All these factors are frequently associated with human NAFLD.

319

320 *Mouse liver histology*

321 Representative images of livers, H&E - and sirius red-stained sections are presented in **Fig. 2**.  
322 At 22 weeks, HFD mice showed clear signs of neutral lipid accumulation surrounding the central  
323 vein (zone 3) with predominance of microvesicular steatosis, which progressed to macrosteatosis  
324 from 30 weeks onwards. An increase in inflammatory activity was evident at 30 weeks, manifested  
325 by the increased presence of clusters of inflammatory cells and hepatic crown-like structures  
326 (hCLS) associated with greater staining of aortic smooth muscle actin (ACTA2/ $\alpha$ -SMA) (**Suppl.**  
327 **Fig. 3**). However, ballooned hepatocytes, a hallmark of NASH in human NAFLD, were only  
328 detected at 40 weeks, concordant with the steep elevation of transaminase levels in plasma (**Fig.**  
329 **1D, E**), and also observed in mice treated with CCl<sub>4</sub>. Mild signs of perisinusoidal stage F1 fibrosis  
330 were evident at 30 weeks in 5 out of 7 animals, whereas at 40 weeks, all mice showed progression  
331 to perisinusoidal and periportal stage F2 fibrosis. All mice treated with CCl<sub>4</sub> exhibited stage F  $\geq$  2,  
332 with progression to stage 3 after 10 weeks, accompanied by lower steatosis scores, severe  
333 necroinflammatory damage and formation of regenerative micronodules. For each biopsy, a SAF  
334 score summarizing the main histological lesions was obtained (**Suppl. Fig 4A**).

335 Western blot analysis of protein expression of perilipin-2 (PLIN2, a marker of lipid droplet  
336 formation), ACTA2/ $\alpha$ -SMA (a marker of stellate cell activation), p62 (a marker of Mallory-Denk  
337 bodies) and collagen alpha-1(I) chain (COL1A1) associated with scar tissue formation confirmed  
338 our histological findings (**Fig. 2B, C**). In a similar manner, expression patterns of genes related to  
339 fatty acid transport and synthesis (*Cd36*, *Scd1*), inflammation (*Tnfa*, *Mcp1*) and fibrogenesis (*Acta2*,  
340 *Tgfb1*) corroborated with the changes observed in the model (**Fig. 2D**).

341 *Time-course analysis of plasma dihydro(sphingolipid) changes in NAFLD mice*

342 Metabolic and histological findings, together with protein and gene expression changes,  
343 confirmed the suitability of the mouse model for investigating the relationship between  
344 (dihydro)sphingolipids and progression of NAFLD. To determine the associations of these

345 compounds with NAFLD development, changes in the plasma concentrations were monitored over  
346 time. Dihydrosphingolipid classes (dhCer and dhSM) were increased early in mouse plasma only  
347 after 4 weeks of HFD feeding and remained higher in the HFD-fed group during the whole follow-  
348 up period. However, the increase in sphingolipids was less significant and Cer and SM areas under  
349 the curves (AUC) were not markedly different from those of control mice (**Fig 3A, B**). The increase  
350 in dihydrosphingolipids was coincident with that of FFA in plasma and liver tissue (**Fig. 3C**).

### 351 *Analysis of liver dihydrosphingolipids of the NAFLD mouse model*

352 While time of diet and exposure to CCl<sub>4</sub> determined disease progression in our mouse model,  
353 we observed substantial heterogeneity in liver histology when these factors were solely considered  
354 (**Suppl. Fig. 4A**). Accordingly, mice were further categorized based on histological findings into  
355 non-NAFLD (normal diet-fed), NAFL, NASH (steatohepatitis without significant fibrosis, F0-F1),  
356 and NASH-fibrosis (steatohepatitis with significant fibrosis, F2-F4) groups (**Suppl. Fig. 4B**). This  
357 grouping system appears the most clinically relevant for NAFLD prognosis (3, 4) and facilitates  
358 comparison with human NAFLD histology.

359 As expected, lipidomic analysis of mouse livers revealed an increase in TG and CE species in  
360 NAFLD mice in concordance with the steatosis score (**Fig. 4A**). Additionally, the concentration of  
361 1-o-acylceramide (ACer), a lipid derived from condensation of fatty acids to one of the free  
362 hydroxyl group of ceramides, was higher, although very low relative to that of TG (**Suppl. Table**  
363 **S1**). The values obtained for the dihydrosphingolipid classes (dhCer, dhSM and dhHexCer) were  
364 higher in NAFLD compared to non-NAFLD mice, especially those corresponding to very-long-  
365 chain fatty acid species (FA 22:0, FA 24:0 and FA 24:1) (**Fig. 4B**). We did not observe a clear trend  
366 of increase for Cer although the concentration was higher in the NASH group, whereas SM was  
367 specifically increased in liver of the NASH-fibrosis group. Advanced fibrosis (F3-F4) was  
368 associated with reduced accumulation of TG, CE and ACer but higher levels of  
369 dihydrosphingolipids (**Suppl. Fig. 5**).



370 We examined the hypothesis that the increase in dihydrosphingolipids in liver may be a result  
371 of changes in the expression of enzymes implicated in their synthesis. In keeping with our  
372 supposition, hepatic gene expression of enzymes involved in *de novo* sphingolipid synthesis, for  
373 instance, serine palmitoyl transferases (*Sptlc1* and *Sptlc2*), ceramide synthases (*Cers2-6*),  
374 dihydroceramide desaturase-1 (*Degs1*) and sphingomyelin synthases (*Sgms1* and *Sgms2*), increased  
375 with severity of NAFLD (**Suppl. Fig. 6**).

### 376 *Lipidomic analysis of liver tissue of NAFLD patients*

377 To further explore whether the changes in (dihydro)sphingolipid levels in mouse liver could  
378 be replicated in human NAFLD, we analyzed the concentrations of lipid species in liver from 94  
379 severe or morbidly obese patients subjected to bariatric surgery with NAFLD diagnosis established  
380 via histology. The clinical, biochemical and demographic characteristics of the cohort are presented  
381 in **Table 1** and the SAF scores in **Suppl. Fig. 7A**. Average age and BMI were determined as  $48.1 \pm$   
382  $9.2$  years and  $46.4 \pm 6.7$  kg/m<sup>2</sup>, with a female predominance (70%). Liver histology revealed some  
383 degree of NAFLD in 73 participants (78%). The rates of hyperlipidemia, hypertension and T2DM  
384 were higher in NAFLD than non-NAFLD groups, specifically in cases of NASH-fibrosis (**Table 1**).  
385 The results of glycemetic parameters (Glu, HbA1c, homeostatic model assessment for insulin  
386 resistance [HOMA-IR]) confirmed a worsening in the metabolic condition, particularly in the  
387 NASH-fibrosis group. ALT displayed a slight increase under conditions of significant fibrosis,  
388 whereas the plasma fibrosis biomarkers, such as hyaluronic acid (HA), cytokeratin-18 (CK18) and  
389 tissue inhibitor metalloproteinase-1 (TIMP1), and fibrosis scores (ELF, FIB-4 and NFS) were  
390 slightly increased with disease progression and aligned with severity of disease (**Table 1**).

391 Importantly, although non-NAFLD control livers were obtained from obese individuals  
392 without histologically proven disease and not truly healthy subjects, the lipidomic analysis of liver  
393 revealed a significant increase in neutral lipids (TG, CE and ACer) in NAFLD relative to non-  
394 NAFLD groups (**Fig. 5A & Table 1**). Moreover, dhCer, dhSM and dhHexCer, and in particular,



395 lipid molecules containing very-long-chain fatty acids (**Fig. 5B**), showed a gradual increase from  
396 NAFL to NASH-fibrosis conditions. These results in human liver were similar to that observed with  
397 the mouse model. Levels of Cer and dhCer species correlated well with the values of TG species  
398 (**Suppl. Fig. 8**). Likewise, we observed no differences in Cer and SM contents among NAFL,  
399 NASH and NASH-fibrosis patient groups (**Table 1**). A significant correlation was evident in the  
400 dihydrosphingolipid contents, especially dhCer, but not other sphingolipid classes (exemplified by  
401 Cer) between liver and plasma (**Fig. 5C**).

#### 402 *Plasma lipidomic analysis of NAFLD patients*

403 Previous liver biopsies were obtained from a cohort of obese patients with short  
404 representation of stages F3–F4, which did not allow comprehensive evaluation of the behaviour of  
405 lipid species in advanced fibrosis. Based on the correlation observed for dihydrosphingolipid  
406 species between liver and plasma, we analyzed plasma samples including those from patients with  
407 advanced fibrosis, with a view to defining the potential of plasma measurements as surrogate  
408 biomarkers of histological lesions. The clinical, biochemical and histological characteristics of the  
409 plasma cohort are presented in **Suppl. Fig. 7B** and **Table 2**. The average age ( $51.7 \pm 11.2$  years)  
410 and BMI ( $41.3 \pm 9.0$  kg/m<sup>2</sup>) of the whole cohort was not markedly different from that of the  
411 bariatric surgery cohort, but the proportion of females was slightly lower (59%,  $p=0.043$ ), age of  
412 NASH-fibrosis patients was higher, and BMI lower relative to the other groups. Rates of  
413 hyperlipidemia, hypertension, T2DM and the trends in glycemic parameters were similar to those  
414 described for the bariatric surgery cohort. Transaminase levels showed a slight increase with  
415 progression from non-NAFLD to NASH-fibrosis. In the latter group, fibrogenesis test scores were  
416 significantly higher compared to the remaining groups (**Table 2**).

417 Overall, lipidomic analysis of plasma samples of the full cohort revealed higher neutral lipid  
418 and dihydrosphingolipid (dhCer, dhSM and dhHexCer) concentrations in NAFLD compared to  
419 non-NAFLD patients (**Fig. 6A, B**). Similar to the findings in liver of both patients and model mice,

420 Cer and SM levels were not significantly affected by disease progression. However, we did not  
421 detect an increase in plasma dihydrosphingolipid in patients with advanced fibrosis stages and  
422 lower steatosis scores, similar to data obtained with mice, reflecting that plasma lipid changes  
423 clearly do not represent a perfect surrogate of changes in liver.

424

## 425 **DISCUSSION**

426       NAFLD is a complex multifactorial disease with a histological spectrum spanning from  
427 generally benign steatosis (NAFL) to steatosis with evidence of hepatocellular inflammation and  
428 damage (NASH). The latter symptom appears in about 25% NAFLD patients, among which 5% go  
429 on to develop NASH-fibrosis (26). The available evidence supports that overnutrition causing  
430 central obesity and insulin resistance defines metabolic predisposition to NASH (27). Ceramides  
431 and their immediate precursors, dihydroceramides, are implicated in NAFLD and other  
432 comorbidities, such as obesity and T2DM (6). However, the relationship of (dihydro)sphingolipid  
433 species with NAFLD progression remains to be established.

434       Here, we firstly explored the role of (dihydro)sphingolipids in a mouse model of NAFLD. To  
435 date, no animal models have fully reproduced all the metabolic and histological hallmarks of human  
436 NAFLD (28, 29). A minimum set of requirements in the animal model is demonstration of  
437 metabolic aspects related to disease such as obesity, IR, and dyslipidemia, in addition to progressive  
438 evolution of liver damage (26). Our regime of choice consisted of a high-fat and cholesterol diet  
439 supplemented with high fructose and glucose. Glucose promotes hyperinsulinemia, which activates  
440 liver FA synthesis by increasing mRNA expression and proteolytic cleavage of the nuclear  
441 transcription factor SREBP1c (30), while fructose acts synergistically to promote *de novo*  
442 lipogenesis and block  $\beta$ -fatty acid oxidation, leading to NAFLD development (31). Addition of high  
443 cholesterol (1.25%) accelerates NASH development, directly activating myofibroblast  
444 transformation of hepatic stellate cells (HSCs) (32). As a result, our model mice developed obesity  
445 and IR at 22 weeks accompanied by progressive transaminase elevation and hypercholesterolemia.  
446 However, hypertriglyceridemia was absent in our model, consistent with previous findings (33-35).  
447 The reason for this phenomenon is not completely clear but may be attributed to the differences in  
448 lipoprotein metabolism between humans and mice. The latter lacks cholesteryl ester transfer  
449 protein, which may reduce the secretion of TG containing very-low density lipoproteins (VLDL) by  
450 liver and stimulate high-density lipoprotein (HDL) production (36).

451 The model additionally demonstrated histological progression from NAFL to NASH, as  
452 evident from the presence of a cluster of inflammatory cells and ballooned hepatocytes at 40 weeks.  
453 The latter finding was confirmed by increased protein expression of p62, a proteasome component  
454 and marker of Mallory-Denk bodies commonly found in human NASH (37). HSC activation and  
455 myofibroblast transformation were validated by the increased protein and gene expression of  $\alpha$ -  
456 SMA and *Tfcb1*, respectively. Immunohistochemical analysis revealed association of the  $\alpha$ -SMA  
457 marker with formation of hCLS, linked with macrophage Kupffer cells surrounding cholesterol-  
458 loaded hepatocytes and synthesis of collagen (38, 39).

459 One disadvantage of our murine model was that even after long-term feeding, disease in  
460 animals did not progress to advanced fibrosis stages, consistent with earlier findings (40). For this  
461 reason, we combined HFD feeding with CCl<sub>4</sub> as a fibrosis accelerator as reported in previous  
462 studies (33). We observed progression to stages F3-F4 in 40% (3 out of 5) mice at 6 weeks and  
463 100% animals after 10 weeks of CCl<sub>4</sub> treatment (33). However, CCl<sub>4</sub> administration was associated  
464 with accelerated weight loss and amelioration of IR. Attenuation of IR could result from the blunted  
465 weight gain, but was also observed in the HFD group of mice at 40 weeks, suggestive of effects of  
466 fibrogenesis on IR. In summary, our mouse model could effectively replicate some of the key  
467 metabolic, inflammatory and profibrotic pathways of human NAFLD.

468 Lipidomic analyses showed that changes in dihydrospingolipid species from liver and  
469 plasma in the mouse model were more significant than those in sphingolipids. Relative to  
470 sphingolipid species that are highly abundant in the diet, the dihydrospingolipid content is  
471 extremely low (41). The majority of dihydrospingolipids were obtained directly from stimulation  
472 of *de novo* synthesis in response to FFA overload, in keeping with earlier reports (8), and confirmed  
473 by the increase in plasma and liver FFA concentrations in parallel with higher gene expression of  
474 *Cd36*, a scavenger receptor that mediates the binding and cellular uptake of FFA (11) and stearyl-  
475 CoA desaturase-1 (*Scd1*), a direct target of SREBP1c, which stimulates fatty acid desaturation and  
476 TG synthesis (42). Moreover, the coordinated increase in gene expression of enzyme isoforms of

477 *Sptlc1-2, Cers2-6, Degs1* and *Sgms1-2* supports that liver of NAFLD mouse responds to the FFA  
478 surplus, triggering not only synthesis of neutral lipids (TG, CE) but also early activation of the  
479 ceramide synthesis pathway. In this context, increase in 1-o-acylceramide (ACer) catalyzed by the  
480 same diacylglycerol acyltransferase 2 (DGAT2) responsible for TG synthesis (43), albeit at levels  
481 four orders in magnitude lower in quantitative terms compared with TG, could be interpreted as a  
482 result of the same spillover mechanism induced by excess liver FFAs.

483 Changes in neutral lipid classes (represented by TG, CE and ACer) were correlated with  
484 histology and reflected in the steatosis score. However, advanced fibrosis stages (F3-F4) were  
485 associated with lower steatosis scores and contents of neutral lipids. This phenomenon is similar to  
486 the reduction of hepatic fat observed in patients with cryptogenic cirrhosis of NAFLD etiology  
487 (burnt-out NASH) (44). However, advanced fibrosis dissociates the increase in dihydrosphingolipid  
488 from the steatosis-linked neutral lipid increase observed in the mouse model (see **Suppl. Fig 5**). We  
489 speculate that advanced fibrosis triggers the expression of sphingomyelinases (45), ceramidases  
490 (46) and sphingosine kinases (47), reducing the available pool of Cer, in turn, promoting *de novo*  
491 sphingolipid synthesis and increasing the dihydrosphingolipid concentration.

492 The concentrations of dihydrosphingolipids in mouse liver increased from NAFL to NASH-  
493 fibrosis, especially those with VLCFA, such as dhCer 40:0, dhCer 42:0 and dhCer 42:1, whereas  
494 Cer and SM-related species showed no changes or a decreasing trend with disease progression. The  
495 general view is that liver respond to HFD feeding triggering the accumulation of C16-Cer and  
496 decreasing the content of VLCFA-Cer (10, 48-50). However, more recently, loss of *Cers2* function,  
497 which partially blocked the synthesis of VLCFA-Cer, failed to increase the Cer 34:1 concentration  
498 in liver, even in mice fed a palmitic acid-enriched diet (51). The diet utilized in our study contained  
499 a higher proportion of cholesterol and lower palmitic acid content than reported previously (10, 48,  
500 49). Therefore, we hypothesize that the high-cholesterol content of our diet is responsible for  
501 differences in the distribution of (dihydro)sphingolipid species relative to previous studies. The free  
502 cholesterol (FC) content was almost double in liver of our NAFLD mice (**Suppl. Table S1**). A

503 major proportion of the excess content is esterified as CE, but the increase in FC is likely to affect  
504 hepatocyte membrane composition where it is known to displace Cer, in particular, shorter C16-  
505 Cer, and associate preferentially with VLCFA-Cer, SM and dihydrosphingolipid species (52).

506         Histological findings in the livers of bariatric surgery patients and plasma of the full NAFLD  
507 cohort were similar to those in the mouse model upon classification according to SAF score (21).  
508 Moreover, metabolic characteristics, dyslipidemia, IR and T2DM, evolution of fibrogenesis  
509 biomarkers and even transaminase changes progressed in a comparable manner from non-NAFLD  
510 to NASH-fibrosis. Lipidomic data from patient biopsies additionally showed many similarities in  
511 the trends observed for neutral lipids (TG, CE and ACer) with the mouse model. Interestingly, we  
512 observed equivalent changes in liver samples of NAFLD patients, with an increase in VLCFA-  
513 dihydrosphingolipid species and no changes in Cer and SM groups, in keeping with recent  
514 publications. On one hand, Vvedenskaya et al. (19) observed no major changes other than neutral  
515 TG, DG and CE contents in liver between NAFL and NASH patient groups. Notably, the  
516 concentrations of Cer and SM were similar between NAFL and NASH. On the other hand, Ooi and  
517 co-workers (18) reported changes in dihydrosphingolipid species between non-NAFLD and  
518 NAFLD but no differences between NAFL and NASH patient groups. Significant differences were  
519 additionally observed for VLCFA-dhCer between the latter two groups.

520         Our data from model mice and patients support the theory that the increase in  
521 dihydrosphingolipid is mediated by upregulation of *de novo* ceramide synthesis and linked to higher  
522 steatosis scores. We observed a good correlation of dhCer levels between liver and plasma and TG  
523 species in liver of patients but no significant associations for Cer species. Secretion of dhCer is  
524 associated with TG and VLDL production, as recently shown by Carlier et al.(17). The same  
525 authors reported that some dhCer species in plasma are associated with hepatic steatosis and NASH  
526 in T2DM patients as well as increased liver gene expression of *Sptlc1*, *Degs1*, *Sgms1*, similar to  
527 data obtained with our mouse model. Moreover, plasma dhCer was reported to be higher in  
528 individuals who eventually progress to diabetes up to 9 years before disease onset (53), in

529 agreement with our interpretation of early stimulation of the *de novo* sphingolipid pathway in  
530 comorbidities directly associated with NAFLD.

531 In view of the existence of good correlations between dihydrosphingolipid concentrations in  
532 the liver and plasma, we were encouraged to extend the study to a larger cohort of patients with  
533 advanced fibrosis stages to determine the potential of measurement of dihydrosphingolipids in  
534 plasma as a biomarker of disease progression. Previous studies that attempted to address this  
535 question recruited limited patients with significant fibrosis (F2-F4) (16, 18, 19, 54). Certain species  
536 of TG (TG 50:1, TG 50:2, TG 52:2 and TG 54:2) in plasma appeared especially well suited to  
537 differentiate between non-NAFL and NAFLD, even when fibrosis was observed, in agreement with  
538 earlier findings. Plasma dihydrosphingolipids showed more significant associations with disease  
539 progression than sphingolipids but their performance was not much better than that of TG species.  
540 Overall, the benefit of measuring these lipid species over available low-cost laboratory assessments  
541 of parameters, such as transaminases, and validated fibrosis scores, such as NAFLD fibrosis score  
542 (NFS), Fibrosis-4 index (FIB-4) and Enhanced liver fibrosis score (ELF), appears to be of limited  
543 utility in stratification of patients with NAFL, NASH and NASH-fibrosis.

544 One of the major strengths of our study is the detailed descriptions of liver and plasma lipid  
545 profiles in the mouse model and NAFLD patient cohort, which showed similar histological and  
546 metabolic alterations. The concentrations of (dihydro)sphingolipids and other lipid species were  
547 analyzed following a validated methodology (24), which demonstrated excellent analytical stability.  
548 The results were expressed as a molar concentration and shared in an open repository, which  
549 facilitates future comparison with other lipidomic datasets from NAFLD patients and ongoing  
550 efforts to harmonize methodology (55).

551 However, our study has several limitations that should be taken into consideration. Although  
552 the transcriptomic and histological evolution of the mouse model is similar to human NAFLD (33),  
553 mice in our experiments were subjected to an extreme diet regime and fibrosis accelerated with  
554 CCl<sub>4</sub>, a toxic agent which has no implications in human pathology (56). We could not differentiate

555 whether the metabolic findings in NASH-fibrosis mice were potentially driven by weight loss  
556 induced by fibrosis evolution or whether progressive fibrosis was responsible for weight loss. In  
557 fact, advanced fibrosis is associated with a hypermetabolic state (57), which may explain the  
558 decrease in weight observed at the NASH-fibrosis stage in the mouse model and patients (see **Table**  
559 **2**). We hypothesized that similar changes in (dihydro)sphingolipid species to those observed in the  
560 liver of mice are likely to occur in patients with NASH-fibrosis. Unfortunately, we could only  
561 analyze the concentrations of lipid species in liver samples of six patients with advanced fibrosis  
562 from the bariatric surgery cohort. Hence, due to the inherent restrictions imposed by low  
563 availability of samples obtained in liver percutaneous biopsies, we were only able to analyze plasma  
564 samples from the cohort of patients with advanced fibrosis. Our results showed that although  
565 significant, at best, changes in dihydrosphingolipid species observed in plasma of NAFLD patients  
566 explained no more than ~50% of those in the liver ( $R=0.52$ , see **Fig. 5**). Therefore, we could not  
567 fully extrapolate the trends in plasma to those in liver of patients. Moreover, we did not evaluate the  
568 effects of the several genetic polymorphisms directly related to lipid metabolism, which are  
569 implicated in changes observed in liver ceramides (15). Nevertheless, earlier studies indicate that  
570 these risk genes do not seem to induce alterations in the liver lipidome (19). Another drawback, is  
571 that non-NAFLD patient liver and plasma samples were obtained from obese individuals without  
572 histologically proven disease and not truly healthy subjects and it might well be that  
573 (dihydro)sphingolipid concentrations were higher in non-NAFLD obese than in healthy individuals.  
574 Besides, the prospective single-point sampling nature of the study in both bariatric surgery and  
575 plasma cohorts of patients did not allow us to draw conclusions about the stability of performed  
576 measurements over time. Due to the inherent complexity of NAFLD, coordinated efforts including  
577 studies on larger sets of NAFLD patients with histologically defined grading and staging of the  
578 disease, elucidation of metabolic conditions and genetic risks, along with research focus on  
579 harmonization of lipidomic analytical approaches are essential to define the roles of lipid species in  
580 disease pathophysiology (58).



581 In conclusion, dihydrosphingolipid species accumulate in the liver of NAFLD patients,  
582 coincident with the patterns observed in a mouse model. The increase in dihydrosphingolipids  
583 reflects early stimulation of the *de novo* ceramide pathway in response to an increased burden of  
584 free fatty acids in the liver. The concentrations of dihydrosphingolipids, particularly those with  
585 very-long-chain fatty acids, correlates with liver triglycerides and steatosis grading based on  
586 histology. Interestingly, the appearance of advanced fibrosis downregulates accumulation of neutral  
587 lipids, but not dihydrosphingolipids in liver in the mouse model. While plasma  
588 dihydrosphingolipids do not appear to achieve a higher diagnostic accuracy than the currently  
589 available clinical chemistry tests, they provide valuable insights into the roles of lipid species in  
590 NAFLD progression. Further studies combining standardized quantitative lipidomic and proteomic  
591 approaches in well-defined cohorts of NAFLD patients are warranted to resolve the unmet need for  
592 plasma surrogate biomarkers of histological lesions in these patient populations.  
593

594 TABLES

595 **Table 1. Clinical and biochemical values in the bariatric surgery cohort.** Patients were  
 596 classified according to their liver histological findings into four groups: non-NAFLD, simple  
 597 steatosis (NAFL), steatohepatitis without significant fibrosis, stage of fibrosis F0-F1 (NASH) and  
 598 steatohepatitis + stage of fibrosis F2-F4 (NASH-fibrosis). Values are expressed in % (N/N total in  
 599 group) or mean  $\pm$  SD or (N total in group). (a) Significant,  $p < 0.05$  from non-NAFLD. (b)  
 600 Significant,  $p < 0.05$  from NAFL. (c) Significant,  $p < 0.05$  from NASH. (d) Significant,  $p < 0.05$  from  
 601 NASH-fibrosis.

| Variable                   | non-NAFLD                             | NAFL                                | NASH                               | NASH-fibrosis                          |
|----------------------------|---------------------------------------|-------------------------------------|------------------------------------|----------------------------------------|
| <b>Demographics</b>        |                                       |                                     |                                    |                                        |
| Number, %                  | 22 (21/94)                            | 47 (44/94)                          | 16 (15/94)                         | 15 (14/94)                             |
| Female, %                  | 76 (16/21)                            | 70 (31/44)                          | 87 (13/15)                         | 43 (6/14)                              |
| Hypertension, %            | 29 (6/21)                             | 55 (24/44)                          | 40 (6/15)                          | 71 (10/14)                             |
| T2DM, %                    | 29 (6/21)                             | 52 (23/44)                          | 47 (7/15)                          | 71 (10/14)                             |
| Hyperlipidaemia, %         | 33 (7/21)                             | 66 (29/44)                          | 60 (9/15)                          | 71 (10/14)                             |
| <b>Anthropometry</b>       |                                       |                                     |                                    |                                        |
| Age, y                     | 43.1 $\pm$ 2.2 (21) <sup>b,c,d</sup>  | 49.2 $\pm$ 1.3 (44) <sup>a</sup>    | 49.0 $\pm$ 2.3 (15) <sup>a</sup>   | 51.071 $\pm$ 2.6 (14) <sup>a</sup>     |
| Weight, Kg                 | 121.7 $\pm$ 4.5 (21) <sup>d</sup>     | 126.9 $\pm$ 3.5 (44) <sup>d</sup>   | 119.3 $\pm$ 6.5 (15) <sup>d</sup>  | 147.3 $\pm$ 8.4 (14) <sup>a,b,c</sup>  |
| BMI, Kg/m <sup>2</sup>     | 44.5 $\pm$ 1.3 (21) <sup>d</sup>      | 46.5 $\pm$ 1.1 (44)                 | 45.7 $\pm$ 1.7 (15)                | 49.4 $\pm$ 1.7 (14) <sup>a</sup>       |
| <b>Laboratory tests</b>    |                                       |                                     |                                    |                                        |
| Glucose, mg/dL             | 91.3 $\pm$ 4.0 (20) <sup>b,c,d</sup>  | 108.3 $\pm$ 4.1 (43) <sup>a,d</sup> | 113.7 $\pm$ 8.5 (15) <sup>a</sup>  | 133.9 $\pm$ 9.0 (14) <sup>a,b</sup>    |
| HbA1c,                     | 5.4 $\pm$ 0.1 (19) <sup>b,c,d</sup>   | 6.2 $\pm$ 0.2 (40) <sup>a,d</sup>   | 6.4 $\pm$ 0.4 (15) <sup>a</sup>    | 7.3 $\pm$ 0.4 (14) <sup>a,b</sup>      |
| HOMA-IR                    | 2.2 $\pm$ 0.3 (20) <sup>b,c,d</sup>   | 4.3 $\pm$ 0.4 (38) <sup>a,d</sup>   | 4.2 $\pm$ 0.8 (11) <sup>a,d</sup>  | 7.2 $\pm$ 1.2 (12) <sup>a,b,c</sup>    |
| Insulin, $\mu$ U/mL        | 10.3 $\pm$ 1.5 (21)                   | 16.5 $\pm$ 1.5 (38)                 | 15.4 $\pm$ 2.7 (11)                | 21.2 $\pm$ 3.3 (12)                    |
| ALT, IU/mL                 | 30.2 $\pm$ 6.7 (20) <sup>d</sup>      | 27.5 $\pm$ 2.3 (41)                 | 32.1 $\pm$ 4.1 (15)                | 44.9 $\pm$ 7.6 (14) <sup>a</sup>       |
| AST, IU/mL                 | 24.7 $\pm$ 6.0 (19) <sup>d</sup>      | 24.4 $\pm$ 1.5 (43)                 | 30.8 $\pm$ 4.4 (15)                | 33.1 $\pm$ 3.6 (14) <sup>a</sup>       |
| GGT, IU/mL                 | 21.2 $\pm$ 4.4 (20) <sup>c</sup>      | 27.3 $\pm$ 3.3 (41)                 | 46.7 $\pm$ 11.3 (15) <sup>a</sup>  | 42.6 $\pm$ 11.7 (14)                   |
| Triglycerides, mg/dL       | 107.2 $\pm$ 9.0 (19) <sup>b,c,d</sup> | 165.7 $\pm$ 13.0 (41) <sup>a</sup>  | 166.9 $\pm$ 18.5 (15) <sup>a</sup> | 186.9 $\pm$ 36.1 (14) <sup>a</sup>     |
| Cholesterol, mg/dL         | 164.4 $\pm$ 8.0 (20)                  | 171.4 $\pm$ 6.2 (42)                | 168.1 $\pm$ 10.5 (15)              | 181.8 $\pm$ 10.9 (13)                  |
| HDLc, mg/dL                | 45.4 $\pm$ 1.9 (20)                   | 40.8 $\pm$ 1.7 (40)                 | 40.8 $\pm$ 2.4 (15)                | 41.8 $\pm$ 2.6 (14)                    |
| LDLc, mg/dL                | 102.3 $\pm$ 6.8 (18)                  | 99.2 $\pm$ 5.7 (41)                 | 93.6 $\pm$ 9.7 (15)                | 103.6 $\pm$ 8.4 (14)                   |
| Albumin, g/dL              | 3.9 $\pm$ 0.1 (21)                    | 4.0 $\pm$ 0.1 (44)                  | 4.0 $\pm$ 0.1 (15)                 | 3.9 $\pm$ 0.1 (14)                     |
| Platelet, $\times 10^9$ /L | 273.8 $\pm$ 14.1 (21)                 | 270.1 $\pm$ 12.6 (43)               | 274.2 $\pm$ 21.7 (14)              | 244.4 $\pm$ 17.1 (14)                  |
| <b>Fibrogenesis tests</b>  |                                       |                                     |                                    |                                        |
| HA, ng/mL                  | 25.8 $\pm$ 5.5 (13) <sup>d</sup>      | 35.1 $\pm$ 5.3 (24)                 | 41.5 $\pm$ 11.7 (6)                | 63.0 $\pm$ 16.6 (14) <sup>a</sup>      |
| PIIINP, ng/mL              | 4.9 $\pm$ 0.4 (13) <sup>b</sup>       | 6.0 $\pm$ 0.4 (24) <sup>a</sup>     | 8.8 $\pm$ 3.3 (6)                  | 6.2 $\pm$ 0.7 (14)                     |
| TIMP, ng/mL                | 124.2 $\pm$ 9.8 (13) <sup>d</sup>     | 137.4 $\pm$ 5.5 (24) <sup>d</sup>   | 141.5 $\pm$ 14.1 (6)               | 180.9 $\pm$ 17.1 (14) <sup>a,b</sup>   |
| CK18, U/L                  | 135.5 $\pm$ 21.8 (14) <sup>d</sup>    | 127.9 $\pm$ 12.6 (24) <sup>d</sup>  | 124.3 $\pm$ 17.4 (6) <sup>d</sup>  | 299.2 $\pm$ 52.3 (14) <sup>a,b,c</sup> |

|                                   |                                     |                                     |                                     |                                     |
|-----------------------------------|-------------------------------------|-------------------------------------|-------------------------------------|-------------------------------------|
| ELF score                         | 7.9 ± 0.3 (13) <sup>d</sup>         | 8.4 ± 0.1 (24)                      | 8.7 ± 0.4 (6)                       | 8.9 ± 0.2 (14) <sup>a</sup>         |
| FIB-4 score                       | 0.691 ± 0.077 (19) <sup>b,d</sup>   | 0.964 ± 0.076 (40) <sup>a</sup>     | 1.082 ± 0.205 (14)                  | 1.12 ± 0.127 (14) <sup>a</sup>      |
| NFS score                         | - 0.835 ± 0.317 (19) <sup>b,d</sup> | 0.015 ± 0.258 (40) <sup>a</sup>     | - 0.148 ± 0.453 (14)                | 0.703 ± 0.325 (14) <sup>a</sup>     |
| <b><i>Liver lipid classes</i></b> |                                     |                                     |                                     |                                     |
| TG, nmol/mg                       | 30.1 ± 2.6 (21) <sup>b,c,d</sup>    | 68.3 ± 3.8 (44) <sup>a,c,d</sup>    | 80.5 ± 5.8 (15) <sup>a,b</sup>      | 96.4 ± 7.6 (14) <sup>a,b</sup>      |
| CE, nmol/mg                       | 14.3 ± 1.3 (21) <sup>b,c,d</sup>    | 23.8 ± 1.6 (44) <sup>a,c,d</sup>    | 35.7 ± 4.4 (15) <sup>a,b</sup>      | 29.9 ± 3.2 (14) <sup>a,b</sup>      |
| FC, nmol/mg                       | 54.7 ± 1.6 (21) <sup>b,d</sup>      | 59.5 ± 1.8 (44) <sup>a,d</sup>      | 54.6 ± 2.4(15) <sup>d</sup>         | 66.2 ± 1.9 (14) <sup>a,b,c</sup>    |
| ACer, nmol/mg                     | 0.006 ± 0.001 (21) <sup>b,c,d</sup> | 0.019 ± 0.001 (44) <sup>a,c,d</sup> | 0.032 ± 0.003 (15) <sup>a,b,d</sup> | 0.047 ± 0.005 (14) <sup>a,b,c</sup> |
| Cer, nmol/mg                      | 1.4 ± 0.1 (21)                      | 1.6 ± 0.1 (44)                      | 1.7 ± 0.2 (15)                      | 1.7 ± 0.1 (14)                      |
| HexCer, nmol/mg                   | 0.48 ± 0.03 (21) <sup>b,c,d</sup>   | 0.57 ± 0.02 (44) <sup>a</sup>       | 0.57 ± 0.04 (15) <sup>a</sup>       | 0.58 ± 0.04 (14) <sup>a</sup>       |
| SM, nmol/mg                       | 17.3 ± 0.6 (21)                     | 17.3 ± 0.6 (44)                     | 17.2 ± 0.8 (15)                     | 17.6 ± 0.7 (14)                     |
| dhCer, nmol/mg                    | 0.105 ± 0.011 (21) <sup>c,d</sup>   | 0.113 ± 0.007 (44) <sup>d</sup>     | 0.147 ± 0.019 (15) <sup>a</sup>     | 0.165 ± 0.021 (14) <sup>a,b</sup>   |
| dhHexCer, nmol/mg                 | 0.007 ± 0.001 (21) <sup>d</sup>     | 0.007 ± 0.001 (44) <sup>d</sup>     | 0.008 ± 0.001 (15)                  | 0.010 ± 0.001 (14) <sup>a,b</sup>   |
| dhSM, nmol/mg                     | 3.46 ± 0.32 (21) <sup>d</sup>       | 3.26 ± 0.19 (44) <sup>d</sup>       | 3.56 ± 0.36 (15) <sup>d</sup>       | 4.88 ± 0.49 (14) <sup>a,b,c</sup>   |
| LPC, nmol/mg                      | 1.12 ± 0.09 (21)                    | 1.12 ± 0.05 (44) <sup>d</sup>       | 1.11 ± 0.09 (15)                    | 0.95 ± 0.06 (14) <sup>a</sup>       |
| PC, nmol/mg                       | 36.9 ± 2.7 (21) <sup>c,d</sup>      | 35.6 ± 1.9 (44) <sup>c,d</sup>      | 54.9 ± 4.4 (15) <sup>a,b,d</sup>    | 29.5 ± 1.8 (14) <sup>a,b,c</sup>    |
| PE, nmol/mg                       | 66.6 ± 4.3 (21) <sup>b</sup>        | 57.6 ± 2.4 (44) <sup>a,d</sup>      | 58.7 ± 3.9 (15)                     | 66.0 ± 3.2 (14) <sup>b</sup>        |

602

603 T2DM. Type II diabetes mellitus ; HbA<sub>1c</sub>, Glycated haemoglobin; HOMA-IR, homeostatic model  
604 assessment for insulin resistance; ALT, alanine aminotransferase; AST, aspartate aminotransferase;  
605 GGT, Gamma glutamyltransferase; BMI, body mass index; HDLc, high-density lipoprotein  
606 cholesterol; LDLc, Low-density lipoprotein cholesterol; HA, Hyaluronic Acid; PIIINP, Procollagen  
607 III aminoterminal peptide; TIMP1, Tissue inhibitor of metalloproteinase-1; CK18, Apoptosis-  
608 associated caspase-cleaved keratin-18. ELF, Enhanced liver fibrosis score; FIB-4, Fibrosis-4 index;  
609 NFS, NAFLD fibrosis score.

610

611

612 **Table 2. Clinical and biochemical values in NAFLD patients from the plasma lipidomics**  
 613 **cohort.** Patients were classified according to their liver histological findings into four groups: non-  
 614 NAFLD, simple steatosis (NAFL), steatohepatitis without significant fibrosis, stage of fibrosis F0-  
 615 F1 (NASH) and steatohepatitis + stage of fibrosis F2-F4 (NASH-fibrosis). Values are expressed in  
 616 % (N/N total in group) or mean  $\pm$  SD or (N total in group). (a) Significant,  $p < 0.05$  from non-  
 617 NAFLD. (b) Significant,  $p < 0.05$  from NAFL. (c) Significant,  $p < 0.05$  from NASH. (d) Significant,  
 618  $p < 0.05$  from NASH-fibrosis.

| Variable                       | non-NAFLD                             | NAFL                                | NASH                                 | NASH-fibrosis                          |
|--------------------------------|---------------------------------------|-------------------------------------|--------------------------------------|----------------------------------------|
| <b>Demographics</b>            |                                       |                                     |                                      |                                        |
| Number, %                      | 15 (29/195)                           | 33 (65/195)                         | 14 (27/195)                          | 38 (74/195)                            |
| Female, %                      | 69 (20/29)                            | 65 (42/65)                          | 63 (17/27)                           | 49 (36/74)                             |
| Obesity, %                     | 100 (29/29)                           | 96 (26/65)                          | 91 (59/27)                           | 76 (56/74)                             |
| Hypertension, %                | 31 (9/29)                             | 46 (30/65)                          | 41 (11/27)                           | 70 (52/74)                             |
| T2DM, %                        | 21 (6/29)                             | 38 (25/65)                          | 44 (12/27)                           | 78 (58/74)                             |
| Dyslipidaemia, %               | 31 (9/29)                             | 71 (46/65)                          | 67 (18/27)                           | 81 (60/74)                             |
| Bariatric Surgery, %           | 100 (29/29)                           | 78 (51/65)                          | 63 (17/27)                           | 19 (14/74)                             |
| <b>Anthropometry</b>           |                                       |                                     |                                      |                                        |
| Age, years                     | 42.3 $\pm$ 1.7 (29) <sup>b,c,d</sup>  | 49.3 $\pm$ 1.1 (65) <sup>a,d</sup>  | 50.0 $\pm$ 1.7 (27) <sup>a,d</sup>   | 58.0 $\pm$ 1.3 (74) <sup>a,b,c</sup>   |
| Weight, Kg                     | 127.6 $\pm$ 4.6 (29) <sup>c,d</sup>   | 119.3 $\pm$ 3.0 (65) <sup>d</sup>   | 115.1 $\pm$ 4.6 (27) <sup>a</sup>    | 107.2 $\pm$ 3.8 (74) <sup>a,b</sup>    |
| BMI, Kg/m <sup>2</sup>         | 45.4 $\pm$ 1.3 (29) <sup>c,d</sup>    | 43.4 $\pm$ 1.1 (65) <sup>d</sup>    | 41.6 $\pm$ 1.5 (27) <sup>a,d</sup>   | 37.7 $\pm$ 1.1 (74) <sup>a,b,c</sup>   |
| <b>Laboratory tests</b>        |                                       |                                     |                                      |                                        |
| Glucose, mg/dL                 | 93.6 $\pm$ 3.0 (28) <sup>b,c,d</sup>  | 109.4 $\pm$ 4.9 (64) <sup>a,d</sup> | 120.1 $\pm$ 9.9 (27) <sup>a,d</sup>  | 142.4 $\pm$ 6.2 (74) <sup>a,b,c</sup>  |
| HbA1c,                         | 5.4 $\pm$ 0.1 (26) <sup>c,d</sup>     | 6.0 $\pm$ 0.1 (61) <sup>d</sup>     | 6.4 $\pm$ 0.3 (26) <sup>a,d</sup>    | 7.0 $\pm$ 0.2 (67) <sup>a,b,c</sup>    |
| HOMA-IR                        | 2.7 $\pm$ 0.4 (28) <sup>b,c,d</sup>   | 4.1 $\pm$ 0.3 (58) <sup>a,d</sup>   | 5.4 $\pm$ 0.7 (22) <sup>a,d</sup>    | 10.4 $\pm$ 1.4 (43) <sup>a,b,c</sup>   |
| Insulin, $\mu$ U/mL            | 12.0 $\pm$ 1.6 (29) <sup>c,d</sup>    | 15.2 $\pm$ 1.1 (58) <sup>d</sup>    | 18.0 $\pm$ 1.9 (22) <sup>a,d</sup>   | 28.2 $\pm$ 3.2 (43) <sup>a,b</sup>     |
| ALT, IU/mL                     | 28.1 $\pm$ 4.8 (28) <sup>c,d</sup>    | 29.6 $\pm$ 1.9 (62) <sup>c,d</sup>  | 38.6 $\pm$ 3.8 (27) <sup>a,b,d</sup> | 53.2 $\pm$ 3.5 (74) <sup>a,b,c</sup>   |
| AST, IU/mL                     | 22.8 $\pm$ 4.3 (27) <sup>d</sup>      | 24.4 $\pm$ 1.4 (63) <sup>d</sup>    | 29.3 $\pm$ 2.7 (27) <sup>d</sup>     | 43.0 $\pm$ 2.4 (74) <sup>a,b,c</sup>   |
| GGT, IU/mL                     | 24.5 $\pm$ 4.9 (28) <sup>c,d</sup>    | 32.1 $\pm$ 3.7 (62) <sup>c,d</sup>  | 53.1 $\pm$ 9.2 (27) <sup>a,b,d</sup> | 104.4 $\pm$ 11.2 (74) <sup>a,b,c</sup> |
| Triglycerides, mg/dL           | 107.3 $\pm$ 7.5 (27) <sup>b,c,d</sup> | 159.3 $\pm$ 11.2 (62) <sup>a</sup>  | 157.9 $\pm$ 13.2 (27) <sup>a</sup>   | 177.9 $\pm$ 12.0 (74) <sup>a</sup>     |
| Cholesterol, mg/dL             | 167.9 $\pm$ 6.5 (28)                  | 176.8 $\pm$ 4.9 (63)                | 180.7 $\pm$ 9.1 (27)                 | 178.0 $\pm$ 4.1 (73)                   |
| HDLc, mg/dL                    | 45.0 $\pm$ 1.6 (28) <sup>d</sup>      | 43.3 $\pm$ 1.4 (61)                 | 41.3 $\pm$ 1.9(27)                   | 41.3 $\pm$ 1.0 (74) <sup>a</sup>       |
| LDLc, mg/dL                    | 105.0 $\pm$ 5.8 (26)                  | 106.2 $\pm$ 4.7 (61)                | 110.9 $\pm$ 7.9 (27)                 | 106.7 $\pm$ 3.5 (73)                   |
| Albumin, g/dL                  | 3.9 $\pm$ 0.1 (29)                    | 3.9 $\pm$ 0.1 (65)                  | 4.0 $\pm$ 0.1 (27)                   | 3.9 $\pm$ 0.1 (74)                     |
| Plaq. counts, $\times 10^9$ /L | 280.1 $\pm$ 11.1 (29) <sup>d</sup>    | 264.2 $\pm$ 9.8 (64) <sup>d</sup>   | 263.5 $\pm$ 14.5 (26) <sup>d</sup>   | 190.6 $\pm$ 7.4 (74) <sup>a,b,c</sup>  |
| <b>Fibrogenesis tests</b>      |                                       |                                     |                                      |                                        |
| HA, ng/mL                      | 26.8 $\pm$ 4.0 (20) <sup>b,d</sup>    | 38.0 $\pm$ 4.3 (42) <sup>a</sup>    | 38.9 $\pm$ 6.2 (17) <sup>a,d</sup>   | 135.6 $\pm$ 27.0 (37) <sup>a,b,c</sup> |

|                                    |                                     |                                   |                                   |                                     |
|------------------------------------|-------------------------------------|-----------------------------------|-----------------------------------|-------------------------------------|
| PIIINP, ng/mL                      | 5.5 ± 0.4 (20) <sup>b,c,d</sup>     | 7.0 ± 0.4 (42) <sup>a</sup>       | 7.8 ± 1.2 (17) <sup>a,d</sup>     | 11.2 ± 0.9 (37) <sup>a,b,c</sup>    |
| TIMP, ng/mL 1                      | 122.9 ± 6.6 (20) <sup>b,c,d</sup>   | 168.4 ± 9.3 (42) <sup>a</sup>     | 192.4 ± 15.3(17) <sup>a,d</sup>   | 268.3 ± 17.2 (37) <sup>a,b,c</sup>  |
| CK18, U/L                          | 117.9 ± 16.1 (21) <sup>d</sup>      | 177.2 ± 29.8 (42) <sup>d</sup>    | 176.6 ± 35.5 (17) <sup>d</sup>    | 331.6 ± 32.0 (36) <sup>a,b,c</sup>  |
| ELF score                          | 8.0 ± 0.2 (20) <sup>b,c,d</sup>     | 8.6 ± 0.1 (42) <sup>a,d</sup>     | 8.7 ± 0.2 (17) <sup>a,d</sup>     | 10.0 ± 0.2 (37) <sup>a,b,c</sup>    |
| FIB-4 score                        | 0.649 ± 0.062 (27) <sup>b,c,d</sup> | 0.939 ± 0.061 (60) <sup>a</sup>   | 0.979 ± 0.116 (26) <sup>a,d</sup> | 2.156 ± 0.154 (74) <sup>a,b,c</sup> |
| NFS score                          | - 0.973 ± 0.236 (27) <sup>d</sup>   | - 0.466 ± 0.209 (60) <sup>d</sup> | - 0.637 ± 0.306 (26) <sup>d</sup> | 0.700 ± 0.144 (74) <sup>a,b,c</sup> |
| <b><i>Plasma lipid classes</i></b> |                                     |                                   |                                   |                                     |
| TG, nmol/mL                        | 233.0 ± 13.8 (29) <sup>b,c,d</sup>  | 297.7 ± 10.3 (65) <sup>a</sup>    | 307.4 ± 20.5 (27) <sup>a</sup>    | 318.1 ± 13.2 (74) <sup>a</sup>      |
| CE, nmol/mL                        | 3574 ± 272 (29) <sup>b</sup>        | 4254 ± 191 (65) <sup>a,d</sup>    | 4097 ± 303 (27)                   | 3634 ± 143 (74) <sup>b</sup>        |
| FC, nmol/mL                        | 1370 ± 50 (29) <sup>b</sup>         | 1554 ± 44 (65) <sup>a</sup>       | 1513 ± 78 (27)                    | 1460 ± 35 (74)                      |
| ACer, nmol/mL                      | 0.153 ± 0.009 (29) <sup>b,c,d</sup> | 0.194 ± 0.007 (65) <sup>a</sup>   | 0.192 ± 0.013 (27) <sup>a,d</sup> | 0.229 ± 0.01 (74) <sup>a,b,c</sup>  |
| Cer, nmol/mL                       | 5.5 ± 0.3 (29) <sup>b,d</sup>       | 6.5 ± 0.2 (65) <sup>a</sup>       | 6.3 ± 0.4 (27)                    | 6.3 ± 0.2 (74) <sup>a</sup>         |
| HexCer, nmol/mL                    | 6.8 ± 0.4 (29)                      | 7.0 ± 0.3 (65)                    | 7.3 ± 0.5 (27)                    | 7.5 ± 0.3 (74)                      |
| SM, nmol/mL                        | 355.3 ± 13.2 (29)                   | 372.6 ± 8.7 (65) <sup>d</sup>     | 388.4 ± 21.5 (27)                 | 349.4 ± 7.7 (74) <sup>b</sup>       |
| dhCer, nmol/mL                     | 0.66 ± 0.05 (29) <sup>d</sup>       | 0.76 ± 0.03 (65) <sup>d</sup>     | 0.76 ± 0.06 (27)                  | 0.87 ± 0.04 (74) <sup>a,b</sup>     |
| dhHexCer, nmol/mL                  | 0.044 ± 0.002 (29) <sup>d</sup>     | 0.049 ± 0.002 (65) <sup>d</sup>   | 0.051 ± 0.004 (27) <sup>d</sup>   | 0.061 ± 0.003 (74) <sup>a,b,c</sup> |
| dhSM, nmol/mL                      | 33.7 ± 1.5 (29)                     | 32.9 ± 1.2 (65)                   | 33.1 ± 1.8 (27)                   | 33.8 ± 1.3 (74)                     |
| LPC, nmol/mL                       | 131.1 ± 8.0 (29) <sup>b,d</sup>     | 153.3 ± 6.8 (65) <sup>a</sup>     | 154.2 ± 9.2 (27)                  | 175.4 ± 6.8 (74) <sup>a,b</sup>     |
| PC, nmol/mL                        | 1071 ± 45 (29) <sup>b,d</sup>       | 1192 ± 39 (65) <sup>a</sup>       | 1193 ± 59 (27)                    | 1249 ± 44 (74) <sup>a</sup>         |
| PE, nmol/mL                        | 41.5 ± 3.4 (29) <sup>b,c,d</sup>    | 51.4 ± 2.3 (65) <sup>a</sup>      | 57.0 ± 4.6 (27) <sup>a</sup>      | 57.0 ± 3.1 (74) <sup>a</sup>        |

619

620 T2DM. Type II diabetes mellitus ; HbA1c, Glycated haemoglobin; HOMA-IR, homeostatic model  
621 assessment for insulin resistance; ALT, alanine aminotransferase; AST, aspartate aminotransferase;  
622 GGT, Gamma glutamyltransferase; BMI, body mass index; HDLc, high-density lipoprotein  
623 cholesterol; LDLc, Low-density lipoprotein cholesterol; HA, Hyaluronic Acid; PIIINP, Procollagen  
624 III aminoterminal peptide; TIMP1, Tissue inhibitor of metalloproteinase 1; CK18, Apoptosis-  
625 associated caspase-cleaved keratin 18. ELF, Enhanced liver fibrosis score; FIB-4, Fibrosis-4 index;  
626 NFS, NAFLD fibrosis score.

627

628

## 629 **FIGURE LEGENDS**

630 **Fig. 1. Metabolic characterization of the NAFLD mice model.** (A) 8 weeks year old mice were  
631 treated with HFD (+ fructose and glucose in water) up to 40 weeks. At 22 weeks a subgroup of  
632 mice was treated with CCl<sub>4</sub> for 6 and 10 weeks. Body weight change during the follow-up period.  
633 Normal chow diet for 22 weeks and 30 weeks (CNT, n=14); HFD for 22 weeks (HFD 22w, n=19);  
634 HFD for 30 weeks (HFD 30w, n=6); HFD for 40 weeks (HFD 40w, n =5), HFD 22w+CCl<sub>4</sub> for 6  
635 weeks (CCl<sub>4</sub> 6w, n=5), HFD 22w+CCl<sub>4</sub> for 10 weeks (CCl<sub>4</sub> 10w, n=14). (B) Liver weight (LW).  
636 (C) liver per body weight ratio (LW/BW). (D) Plasma ALT. (E) Plasma AST. (F) Plasma total  
637 cholesterol. (G) Plasma total triglycerides. (H) Plasma high-density lipoprotein cholesterol. (I)  
638 Fasting blood glucose. (J) Oral glucose tolerance test. (H) Area under the curve in the OGTT.  
639 Results were expressed as mean ± SD. For better clarity, only the student t-test comparison respect  
640 to the CNT group for HFD 22w, HFD 30w, and HFD 40w and CCl<sub>4</sub> 6w, CCl<sub>4</sub> 10w respect to HFD  
641 22w, are showed. \*p <0.05, \*\*p <0.01, \*\*\*p <0.001, \*\*\*\* p<0.0001. ALT, alanine  
642 aminotransferase; AST, aspartate aminotransferase; CCl<sub>4</sub>, carbon tetrachloride; HFD, high fat diet;  
643 CNT, normal chow diet; Chol, total cholesterol; Trig, total triglycerides; Glu, glucose; HDLc, high-  
644 density lipoprotein cholesterol; OGTT, oral glucose tolerance test; AUC, area under the curve, LW,  
645 Liver weight, BW, body weight.

646

647 **Fig. 2. Histological features correlate with protein and gene expression biomarkers or disease**  
648 **progression in the mice model.** (A) Macroscopic appearance, hematoxylin and eosin, and sirius  
649 red staining of representative liver from mice on normal chow diet for 22 weeks (CNT 22w); high-  
650 fat diet HFD for 22 weeks (HFD 22w); HFD for 30 weeks (HFD 30w); HFD for 40 weeks (HFD  
651 40w), HFD 22w+CCl<sub>4</sub> for 6 weeks (CCl<sub>4</sub> 6w) and HFD 22w+CCl<sub>4</sub> for 10 weeks (CCl<sub>4</sub> 10w).  
652 Original magnification x100. (B) Representative Western-blot of PLIN2, α-SMA, p62, COLA1A  
653 and housekeeping standard HSP90 in liver lysates from CNT 22w, HFD 22w, HFD 30w, HFD 40w,

654 CCl<sub>4</sub> 10w. (C) Densitometric analysis of the ratio of PLIN2,  $\alpha$ -SMA, p62 and COLA1A,  
655 normalized by HSP90. Data represent the mean  $\pm$  SD of n=5 samples per condition. (C) Gene  
656 expression levels of *Cd36*, *Scd1*, *Tnfa* and *Tfgeb1* in the liver of CNT 22w, HFD 22w, HFD 30w,  
657 HFD 40w, CCl<sub>4</sub> 10w. Data represent the mean  $\pm$  SD of n=5 samples per condition. \*p <0.05, \*\*p  
658 <0.01, \*\*\*p <0.001. \*\*\*\*p <0.0001.

659

660 **Fig. 3. Dihydrospingolipid evolution is associated to the increase in FFA in the mice model.**

661 (A) Time-course of plasma sphingolipid classes: Cer, dhCer, SM, dhSM in normal chow (CNT) and  
662 high-fat diet (+fructose and glucose). Lipid classes were calculated as the sum composition from  
663 the corresponding lipid species. Data represent the mean  $\pm$  SEM of n=3-4 animals per group. (B)  
664 AUC of sphingolipid molecular species. Data represent the mean  $\pm$  SEM of n=3-4 animals per  
665 group. (C) FFA in plasma and liver tissue samples from mice on normal chow diet for 22 weeks  
666 (CNT 22w); high-fat diet HFD for 22 weeks (HFD 22w); HFD for 30 weeks (HFD 30w); HFD for  
667 40 weeks (HFD 40w), HFD 22w+CCl<sub>4</sub> for 6 weeks (CCl<sub>4</sub> 6w). Data represent the mean  $\pm$  SD of  
668 n=5-7 animals per group. \*\* p<0.01. Cer, ceramide; dhCer, dihydroceramide; SM, sphingomyelin;  
669 dhSM, dihydrospingomyelin. FFA, free fatty acids.

670

671 **Fig. 4. Lipidomic analysis of (dihydro)spingolipids in NAFLD mice liver.** (A) Quantitative  
672 analysis of lipid species from 10 classes (see Suppl. Table 2 for class concentrations), were  
673 determined in livers of mice histologically classified as: non-NAFLD (n=7), simple steatosis  
674 (NAFL, n=17), steatohepatitis without significant fibrosis, stage of fibrosis F0-F1 (NASH, n=9) and  
675 steatohepatitis + stage of fibrosis F2-F4 (NASH-fibrosis, n=24). The values of Log<sub>2</sub>-fold change of  
676 each animal (column) and each lipid specie (row) is plotted in the in the heatmap and ordered by the  
677 hierarchical clustering of individuals (columns). (B) Hepatic concentrations of representative  
678 species of TG, dhSM, dhCer, dhHexCer, Cer and SM. Average values are represented as boxplots,  
679 with points showing the value of each mice. \*p <0.05, \*p <0.01, \*\*\*p <0.001 and \*\*\*\*p <0.001,

680 using Student's t-test. TG, triglyceride; CE, Cholesteryl ester; FC, free cholesterol; ACer, 1-o-  
681 Acylceramide; Cer, ceramide; HexCer, hexosylceramide; SM, Sphingomyelin; dhCer,  
682 dihydroceramide; dhHexCer, dihydrohexosylceramide dhSM, dihydrosphingomyelin. NASF;  
683 NASH-fibrosis

684

685 **Fig. 5. Lipidomic analysis of (dihydro)sphingolipids of livers from the bariatric surgery**

686 **cohort.** (A) Quantitative analysis of lipid species from 10 classes (see Table 1 for lipid class

687 concentrations), were determined in livers of patients histologically classified as: non-NAFLD

688 (n=21), simple steatosis (NAFL, n=44), steatohepatitis without significant fibrosis, stage of fibrosis

689 F0-F1 (NASH, n=15) and steatohepatitis + stage of fibrosis F2-F4 (NASH-fibrosis, n=14). The

690 values of Log<sub>2</sub>-fold change of each patient (column) and each lipid specie (row) is plotted in the in

691 the heatmap and ordered by the hierarchical clustering of individuals (columns). (B) Hepatic

692 concentrations of representative species of TG, dhSM, dhCer, dhHexCer, Cer and SM. Average

693 values are represented as boxplots, with points showing the value of each patient. (C) Correlation

694 plot between plasma and liver concentrations for Cer, dhCer and TG. \*p <0.05, \*\*p <0.01, \*\*\*p

695 <0.001 and \*\*\*\*p <0.001, using Student's t-test or the Pearson's correlation coefficient. TG,

696 triglyceride; CE, Cholesteryl ester; FC, free cholesterol; ACer, 1-o-Acylceramide; Cer, ceramide;

697 HexCer, hexosylceramide; SM, Sphingomyelin; dhCer, dihydroceramide; dhHexCer,

698 dihydrohexosylceramide dhSM, dihydrosphingomyelin. NASF; NASH-fibrosis

699

700 **Fig. 6. Lipidomic analysis of (dihydro)sphingolipids in plasma of NAFLD patients.** (A)

701 Quantitative analysis of lipid species from 10 classes (see Table 2 for lipid class concentrations),

702 were determined in livers of patients histologically classified as: non-NAFLD (n=29), simple

703 steatosis (NAFL, n=65), steatohepatitis without significant fibrosis, stage of fibrosis F0-F1 (NASH,

704 n=27) and steatohepatitis + stage of fibrosis F2-F4 (NASH-fibrosis, n=74). The values of Log<sub>2</sub>-fold

705 change of each patient (column) and each lipid specie (row) is plotted in the in the heatmap and

706 ordered by the hierarchical clustering of individuals (columns). (B) Hepatic concentrations of



707 representative species of TG, dhSM, dhCer, dhHexCer, Cer and SM. Average values are  
708 represented as boxplots, with points showing the value of each patient. \*p <0.05, \*\*p <0.01, \*\*\*p  
709 <0.001 and \*\*\*\*p <0.001, using Student's t-test. TG, triglyceride; CE, Cholesteryl ester; FC, free  
710 cholesterol; ACer, 1-o-Acylceramide; Cer, ceramide; HexCer, hexosylceramide; SM,  
711 Sphingomyelin; dhCer, dihydroceramide; dhHexCer, dihydrohexosylceramide dhSM,  
712 dihydrosphingomyelin. NASF; NASH-fibrosis  
713

714 **ACKNOWLEDGMENTS**

715           We thank the Quantification and Molecular Characterization Unit (UCA-CCM IRYCIS) for  
716 their technical help. JL Rodríguez-Navarro for helping with animals. P. Mediavilla, D. Mora, L.  
717 Alcázar and I. Candela for their assistance with blood biochemistry assays and International  
718 Science Editing for English style revision.

719

720

721

722

723 **REFERENCES**

724

- 725 1. Eslam M, Newsome PN, Sarin SK, Anstee QM, Targher G, Romero-Gomez M, et al. A new  
726 definition for metabolic dysfunction-associated fatty liver disease: An international expert consensus  
727 statement. *Journal of hepatology*. 2020;73(1):202-9.
- 728 2. Chalasani N, Younossi Z, Lavine JE, Charlton M, Cusi K, Rinella M, et al. The diagnosis and  
729 management of nonalcoholic fatty liver disease: Practice guidance from the American Association  
730 for the Study of Liver Diseases. *Hepatology (Baltimore, Md)*. 2018;67(1):328-57.
- 731 3. Angulo P, Kleiner DE, Dam-Larsen S, Adams LA, Bjornsson ES, Charatcharoenwittaya P,  
732 et al. Liver Fibrosis, but No Other Histologic Features, Is Associated With Long-term Outcomes of  
733 Patients With Nonalcoholic Fatty Liver Disease. *Gastroenterology*. 2015;149(2):389-97 e10.
- 734 4. Sanyal AJ, Van Natta ML, Clark J, Neuschwander-Tetri BA, Diehl A, Dasarathy S, et al.  
735 Prospective Study of Outcomes in Adults with Nonalcoholic Fatty Liver Disease. *The New England*  
736 *journal of medicine*. 2021;385(17):1559-69.
- 737 5. Samuel VT, Shulman GI. Nonalcoholic Fatty Liver Disease, Insulin Resistance, and  
738 Ceramides. *The New England journal of medicine*. 2019;381(19):1866-9.
- 739 6. Hajduch E, Lachkar F, Ferre P, Foufelle F. Roles of Ceramides in Non-Alcoholic Fatty Liver  
740 Disease. *J Clin Med*. 2021;10(4).
- 741 7. Green CD, Maceyka M, Cowart LA, Spiegel S. Sphingolipids in metabolic disease: The good,  
742 the bad, and the unknown. *Cell metabolism*. 2021;33(7):1293-306.
- 743 8. Summers SA, Chaurasia B, Holland WL. Metabolic Messengers: ceramides. *Nat Metab*.  
744 2019;1(11):1051-8.
- 745 9. Jiang M, Li C, Liu Q, Wang A, Lei M. Inhibiting Ceramide Synthesis Attenuates Hepatic  
746 Steatosis and Fibrosis in Rats With Non-alcoholic Fatty Liver Disease. *Front Endocrinol (Lausanne)*.  
747 2019;10:665.
- 748 10. Kim YR, Lee EJ, Shin KO, Kim MH, Pewzner-Jung Y, Lee YM, et al. Hepatic triglyceride  
749 accumulation via endoplasmic reticulum stress-induced SREBP-1 activation is regulated by ceramide  
750 synthases. *Exp Mol Med*. 2019;51(11):1-16.
- 751 11. Chaurasia B, Tippetts TS, Mayoral Monibas R, Liu J, Li Y, Wang L, et al. Targeting a  
752 ceramide double bond improves insulin resistance and hepatic steatosis. *Science*.  
753 2019;365(6451):386-92.
- 754 12. Raichur S, Wang ST, Chan PW, Li Y, Ching J, Chaurasia B, et al. CerS2 haploinsufficiency  
755 inhibits beta-oxidation and confers susceptibility to diet-induced steatohepatitis and insulin  
756 resistance. *Cell metabolism*. 2014;20(4):687-95.

- 757 13. Ichi I, Nakahara K, Fujii K, Iida C, Miyashita Y, Kojo S. Increase of ceramide in the liver and  
758 plasma after carbon tetrachloride intoxication in the rat. *Journal of nutritional science and*  
759 *vitaminology*. 2007;53(1):53-6.
- 760 14. Apostolopoulou M, Gordillo R, Koliaki C, Gancheva S, Jelenik T, De Filippo E, et al. Specific  
761 Hepatic Sphingolipids Relate to Insulin Resistance, Oxidative Stress, and Inflammation in  
762 Nonalcoholic Steatohepatitis. *Diabetes Care*. 2018;41(6):1235-43.
- 763 15. Luukkonen PK, Zhou Y, Sadevirta S, Leivonen M, Arola J, Oresic M, et al. Hepatic ceramides  
764 dissociate steatosis and insulin resistance in patients with non-alcoholic fatty liver disease. *Journal of*  
765 *hepatology*. 2016;64(5):1167-75.
- 766 16. Jung Y, Lee MK, Puri P, Koo BK, Joo SK, Jang SY, et al. Circulating lipidomic alterations  
767 in obese and non-obese subjects with non-alcoholic fatty liver disease. *Aliment Pharmacol Ther*.  
768 2020;52(10):1603-14.
- 769 17. Carlier A, Phan F, Szpigel A, Hajduch E, Salem JE, Gautheron J, et al. Dihydroceramides in  
770 Triglyceride-Enriched VLDL Are Associated with Nonalcoholic Fatty Liver Disease Severity in  
771 Type 2 Diabetes. *Cell Rep Med*. 2020;1(9):100154.
- 772 18. Ooi GJ, Meikle PJ, Huynh K, Earnest A, Roberts SK, Kemp W, et al. Hepatic lipidomic  
773 remodeling in severe obesity manifests with steatosis and does not evolve with non-alcoholic  
774 steatohepatitis. *Journal of hepatology*. 2021.
- 775 19. Vvedenskaya O, Rose TD, Knittelfelder O, Palladini A, Wodke JAH, Schumann K, et al.  
776 Non-alcoholic fatty liver disease Stratification by Liver Lipidomics. *Journal of lipid research*.  
777 2021:100104.
- 778 20. Satapathy SK, Kuwajima V, Nadelson J, Atiq O, Sanyal AJ. Drug-induced fatty liver disease:  
779 An overview of pathogenesis and management. *Annals of hepatology*. 2015;14(6):789-806.
- 780 21. Bedossa P, Poitou C, Veyrie N, Bouillot JL, Basdevant A, Paradis V, et al. Histopathological  
781 algorithm and scoring system for evaluation of liver lesions in morbidly obese patients. *Hepatology*  
782 (Baltimore, Md). 2012;56(5):1751-9.
- 783 22. Pfaffl MW. A new mathematical model for relative quantification in real-time RT-PCR.  
784 *Nucleic Acids Res*. 2001;29(9):e45.
- 785 23. Andrikopoulos S, Blair AR, Deluca N, Fam BC, Proietto J. Evaluating the glucose tolerance  
786 test in mice. *American journal of physiology Endocrinology and metabolism*. 2008;295(6):E1323-  
787 32.
- 788 24. Babiy B, Busto R, Pastor O. A normalized signal calibration with a long-term reference  
789 improves the robustness of RPLC-MRM/MS lipidomics in plasma. *Analytical and bioanalytical*  
790 *chemistry*. 2021;413(15):4077-90.

- 791 25. Folch J, Lees M, Sloane Stanley GH. A simple method for the isolation and purification of  
792 total lipides from animal tissues. *The Journal of biological chemistry*. 1957;226(1):497-509.
- 793 26. Younossi ZM, Koenig AB, Abdelatif D, Fazel Y, Henry L, Wymer M. Global epidemiology  
794 of nonalcoholic fatty liver disease-Meta-analytic assessment of prevalence, incidence, and outcomes.  
795 *Hepatology (Baltimore, Md)*. 2016;64(1):73-84.
- 796 27. Loomba R, Friedman SL, Shulman GI. Mechanisms and disease consequences of  
797 nonalcoholic fatty liver disease. *Cell*. 2021;184(10):2537-64.
- 798 28. Farrell G, Schattenberg JM, Leclercq I, Yeh MM, Goldin R, Teoh N, et al. Mouse Models of  
799 Nonalcoholic Steatohepatitis: Toward Optimization of Their Relevance to Human Nonalcoholic  
800 Steatohepatitis. *Hepatology (Baltimore, Md)*. 2019;69(5):2241-57.
- 801 29. Jahn D, Kircher S, Hermanns HM, Geier A. Animal models of NAFLD from a hepatologist's  
802 point of view. *Biochim Biophys Acta Mol Basis Dis*. 2018.
- 803 30. Brown MS, Goldstein JL. Selective versus total insulin resistance: a pathogenic paradox. *Cell*  
804 *metabolism*. 2008;7(2):95-6.
- 805 31. Jensen T, Abdelmalek MF, Sullivan S, Nadeau KJ, Green M, Roncal C, et al. Fructose and  
806 sugar: A major mediator of non-alcoholic fatty liver disease. *Journal of hepatology*. 2018;68(5):1063-  
807 75.
- 808 32. Tomita K, Teratani T, Suzuki T, Shimizu M, Sato H, Narimatsu K, et al. Free cholesterol  
809 accumulation in hepatic stellate cells: mechanism of liver fibrosis aggravation in nonalcoholic  
810 steatohepatitis in mice. *Hepatology (Baltimore, Md)*. 2014;59(1):154-69.
- 811 33. Tsuchida T, Lee YA, Fujiwara N, Ybanez M, Allen B, Martins S, et al. A simple diet- and  
812 chemical-induced murine NASH model with rapid progression of steatohepatitis, fibrosis and liver  
813 cancer. *Journal of hepatology*. 2018;69(2):385-95.
- 814 34. Gallou-Kabani C, Vige A, Gross MS, Rabes JP, Boileau C, Larue-Achagiotis C, et al.  
815 C57BL/6J and A/J mice fed a high-fat diet delineate components of metabolic syndrome. *Obesity*  
816 *(Silver Spring)*. 2007;15(8):1996-2005.
- 817 35. Wong SK, Chin KY, Suhaimi FH, Fairus A, Ima-Nirwana S. Animal models of metabolic  
818 syndrome: a review. *Nutrition & metabolism*. 2016;13:65.
- 819 36. Podrini C, Cambridge EL, Lelliott CJ, Carragher DM, Estabel J, Gerdin AK, et al. High-fat  
820 feeding rapidly induces obesity and lipid derangements in C57BL/6N mice. *Mamm Genome*.  
821 2013;24(5-6):240-51.
- 822 37. Zatloukal K, French SW, Stumptner C, Strnad P, Harada M, Toivola DM, et al. From Mallory  
823 to Mallory-Denk bodies: what, how and why? *Exp Cell Res*. 2007;313(10):2033-49.

- 824 38. Itoh M, Kato H, Suganami T, Konuma K, Marumoto Y, Terai S, et al. Hepatic crown-like  
825 structure: a unique histological feature in non-alcoholic steatohepatitis in mice and humans. *PloS one*.  
826 2013;8(12):e82163.
- 827 39. Ioannou GN, Subramanian S, Chait A, Haigh WG, Yeh MM, Farrell GC, et al. Cholesterol  
828 crystallization within hepatocyte lipid droplets and its role in murine NASH. *Journal of lipid research*.  
829 2017;58(6):1067-79.
- 830 40. Krishnan A, Abdullah TS, Mounajjed T, Hartono S, McConico A, White T, et al. A  
831 longitudinal study of whole body, tissue, and cellular physiology in a mouse model of fibrosing  
832 NASH with high fidelity to the human condition. *American journal of physiology Gastrointestinal  
833 and liver physiology*. 2017;312(6):G666-G80.
- 834 41. Wan J, Li J, Bandyopadhyay S, Kelly SL, Xiang Y, Zhang J, et al. Analysis of 1-  
835 Deoxysphingoid Bases and Their N-Acyl Metabolites and Exploration of Their Occurrence in Some  
836 Food Materials. *Journal of agricultural and food chemistry*. 2019;67(46):12953-61.
- 837 42. Sampath H, Miyazaki M, Dobrzyn A, Ntambi JM. Stearoyl-CoA desaturase-1 mediates the  
838 pro-lipogenic effects of dietary saturated fat. *The Journal of biological chemistry*. 2007;282(4):2483-  
839 93.
- 840 43. Senkal CE, Salama MF, Snider AJ, Allopenna JJ, Rana NA, Koller A, et al. Ceramide Is  
841 Metabolized to Acylceramide and Stored in Lipid Droplets. *Cell metabolism*. 2017;25(3):686-97.
- 842 44. van der Poorten D, Samer CF, Ramezani-Moghadam M, Coulter S, Kacevska M, Schrijnders  
843 D, et al. Hepatic fat loss in advanced nonalcoholic steatohepatitis: are alterations in serum adiponectin  
844 the cause? *Hepatology (Baltimore, Md)*. 2013;57(6):2180-8.
- 845 45. van Koppen A, Verschuren L, van den Hoek AM, Verheij J, Morrison MC, Li K, et al.  
846 Uncovering a Predictive Molecular Signature for the Onset of NASH-Related Fibrosis in a  
847 Translational NASH Mouse Model. *Cell Mol Gastroenterol Hepatol*. 2018;5(1):83-98 e10.
- 848 46. Alsamman S, Christenson SA, Yu A, Ayad NME, Mooring MS, Segal JM, et al. Targeting  
849 acid ceramidase inhibits YAP/TAZ signaling to reduce fibrosis in mice. *Science translational  
850 medicine*. 2020;12(557).
- 851 47. Mauer AS, Hirsova P, Maiers JL, Shah VH, Malhi H. Inhibition of sphingosine 1-phosphate  
852 signaling ameliorates murine nonalcoholic steatohepatitis. *American journal of physiology  
853 Gastrointestinal and liver physiology*. 2017;312(3):G300-G13.
- 854 48. Kasumov T, Li L, Li M, Gulshan K, Kirwan JP, Liu X, et al. Ceramide as a mediator of non-  
855 alcoholic Fatty liver disease and associated atherosclerosis. *PloS one*. 2015;10(5):e0126910.
- 856 49. Raichur S, Brunner B, Bielohuby M, Hansen G, Pfenninger A, Wang B, et al. The role of  
857 C16:0 ceramide in the development of obesity and type 2 diabetes: CerS6 inhibition as a novel  
858 therapeutic approach. *Molecular metabolism*. 2019;21:36-50.

- 859 50. Hammerschmidt P, Ostkotte D, Nolte H, Gerl MJ, Jais A, Brunner HL, et al. CerS6-Derived  
860 Sphingolipids Interact with Mff and Promote Mitochondrial Fragmentation in Obesity. *Cell*.  
861 2019;177(6):1536-52 e23.
- 862 51. Nicholson RJ, Poss AM, Maschek JA, Cox JE, Hopkins PN, Hunt SC, et al. Characterizing a  
863 Common CERS2 Polymorphism in a Mouse Model of Metabolic Disease and in Subjects from the  
864 Utah CAD Study. *J Clin Endocrinol Metab*. 2021;106(8):e3098-e109.
- 865 52. Alonso A, Goni FM. The Physical Properties of Ceramides in Membranes. *Annu Rev*  
866 *Biophys*. 2018;47:633-54.
- 867 53. Wigger L, Cruciani-Guglielmacci C, Nicolas A, Denom J, Fernandez N, Fumeron F, et al.  
868 Plasma Dihydroceramides Are Diabetes Susceptibility Biomarker Candidates in Mice and Humans.  
869 *Cell reports*. 2017;18(9):2269-79.
- 870 54. Mayo R, Crespo J, Martinez-Arranz I, Banales JM, Arias M, Minchole I, et al. Metabolomic-  
871 based noninvasive serum test to diagnose nonalcoholic steatohepatitis: Results from discovery and  
872 validation cohorts. *Hepatology communications*. 2018;2(7):807-20.
- 873 55. Liebisch G, Ekroos K, Hermansson M, Ejsing CS. Reporting of lipidomics data should be  
874 standardized. *Biochim Biophys Acta Mol Cell Biol Lipids*. 2017;1862(8):747-51.
- 875 56. Castro RE, Diehl AM. Towards a definite mouse model of NAFLD. *Journal of hepatology*.  
876 2018;69(2):272-4.
- 877 57. Anand AC. Nutrition and Muscle in Cirrhosis. *J Clin Exp Hepatol*. 2017;7(4):340-57.
- 878 58. Masoodi M, Gastaldelli A, Hyotylainen T, Arretxe E, Alonso C, Gaggini M, et al.  
879 Metabolomics and lipidomics in NAFLD: biomarkers and non-invasive diagnostic tests. *Nat Rev*  
880 *Gastroenterol Hepatol*. 2021;18(12):835-56.
- 881

**Fig. 1**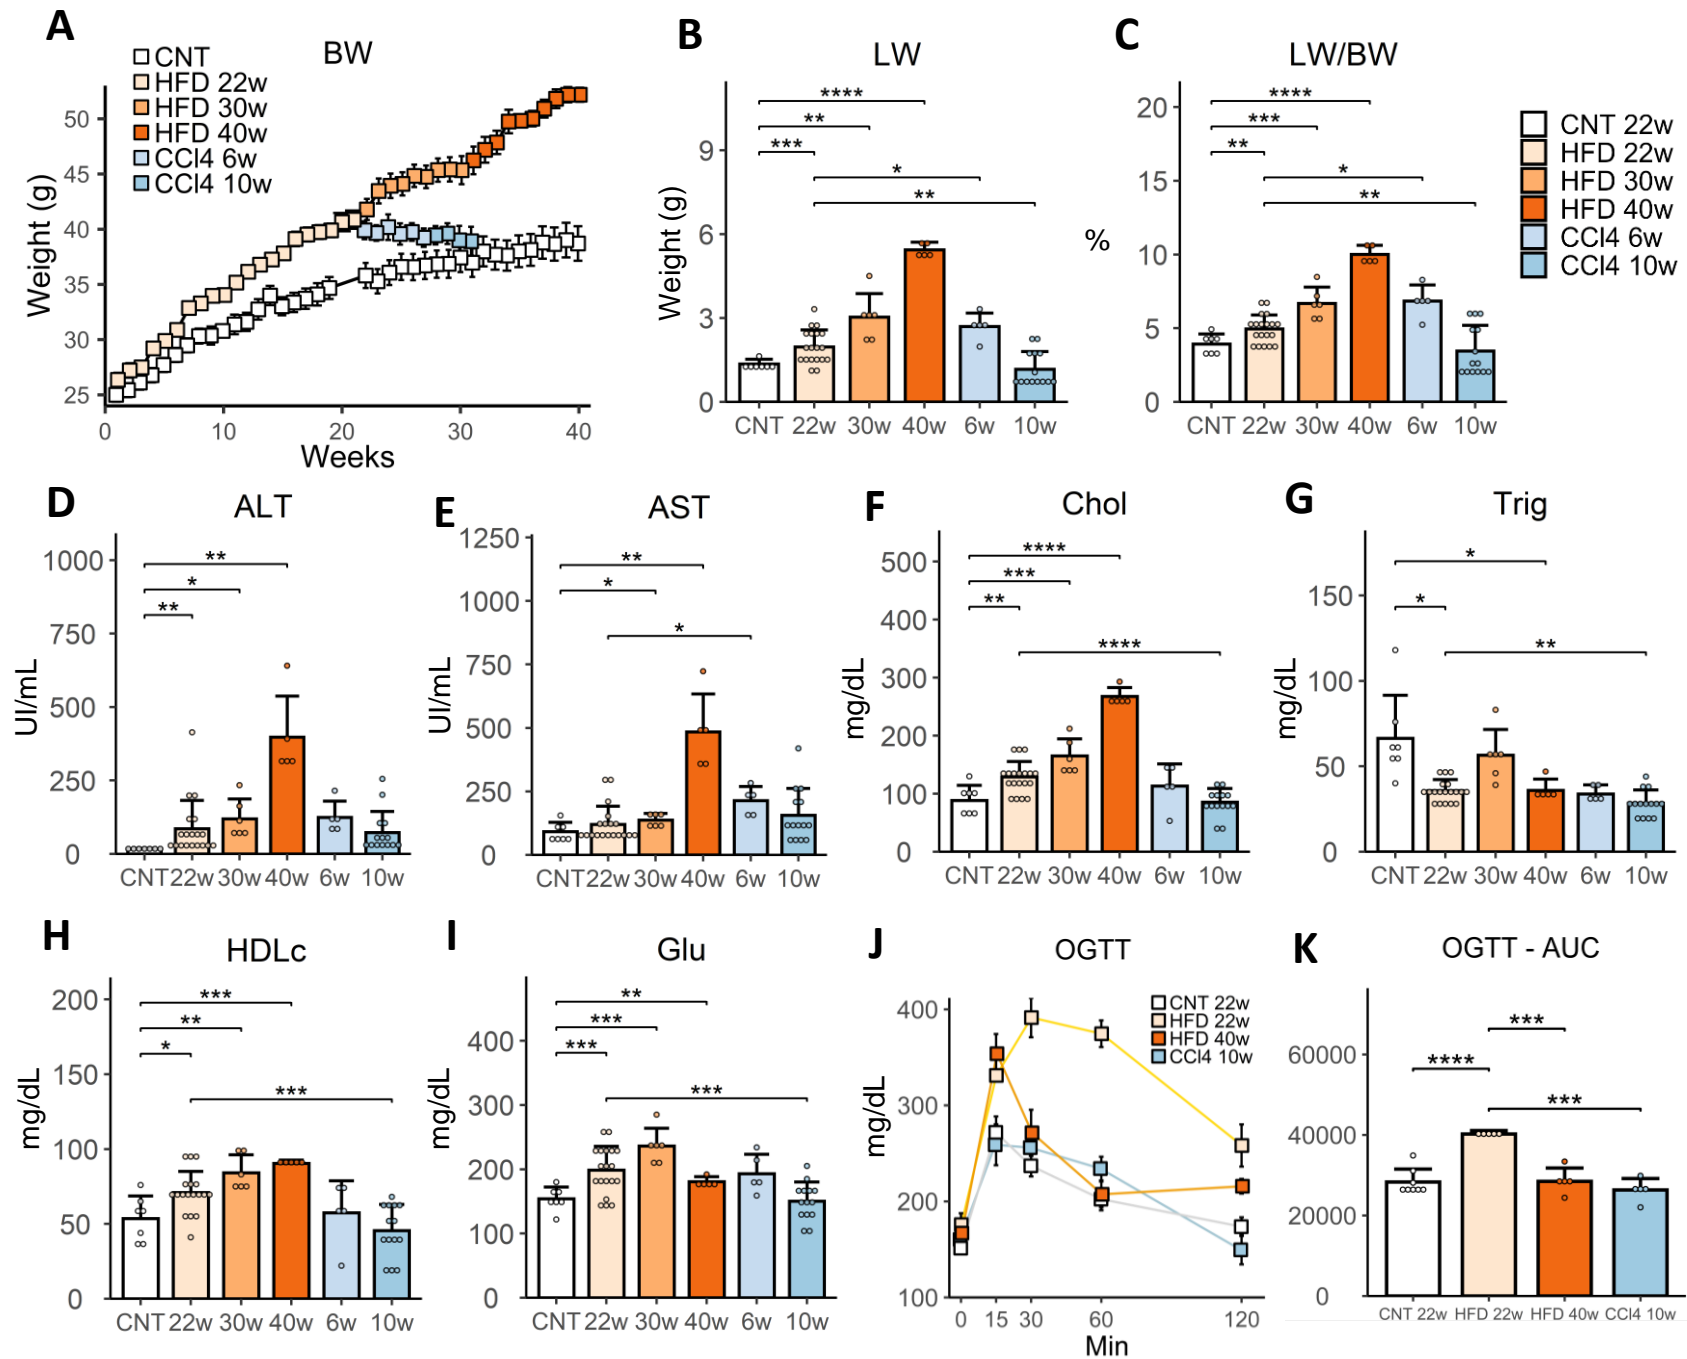



**Fig. 2****A**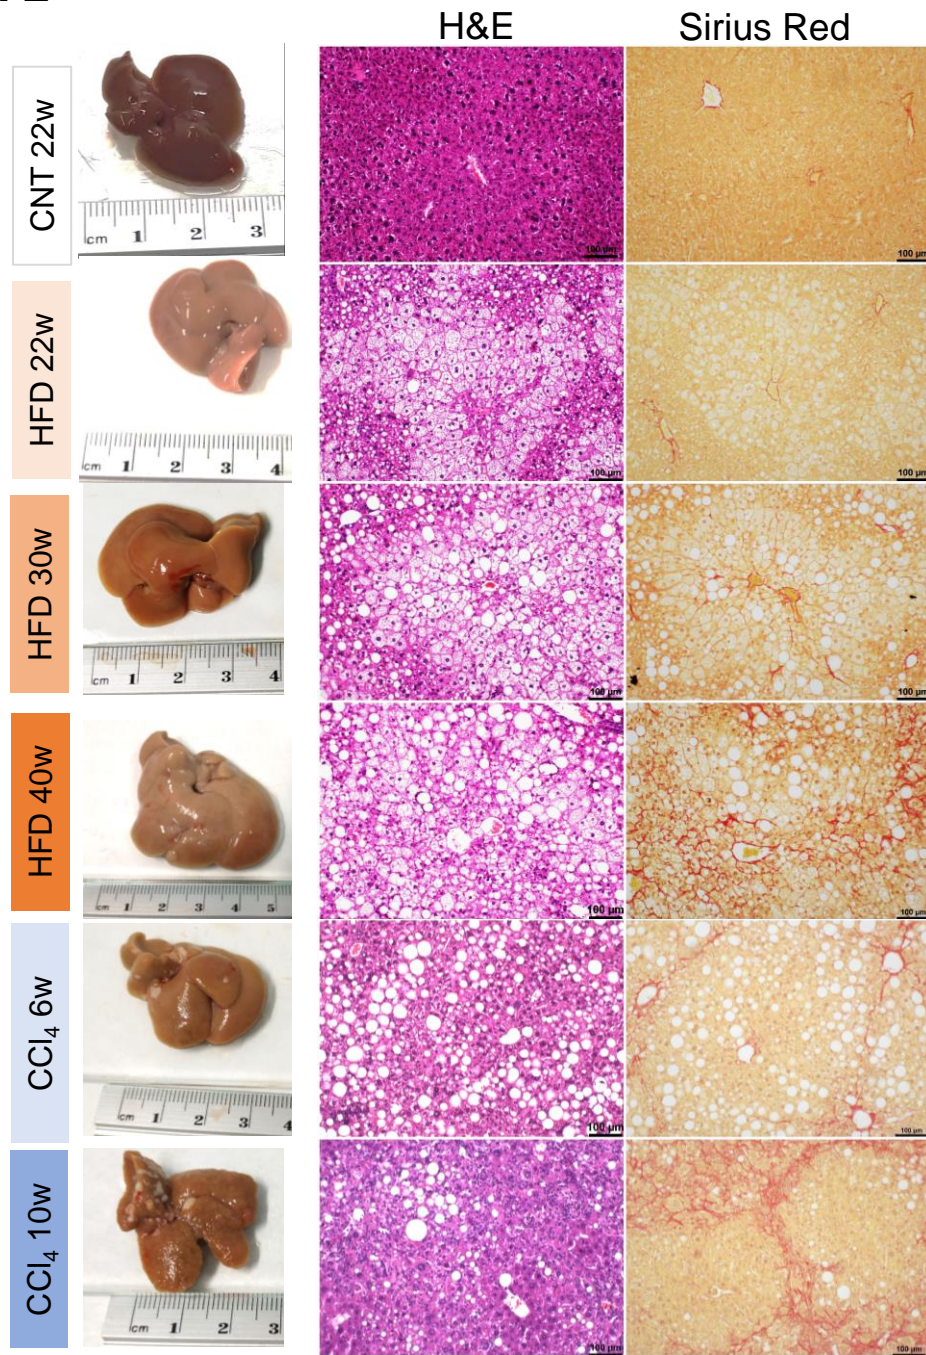**B**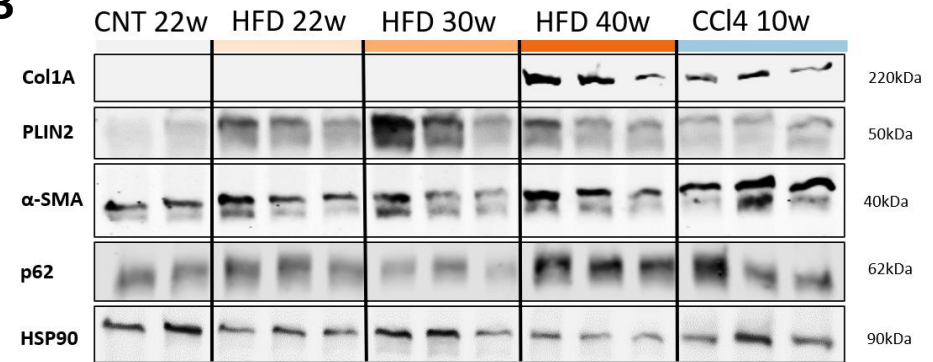**C**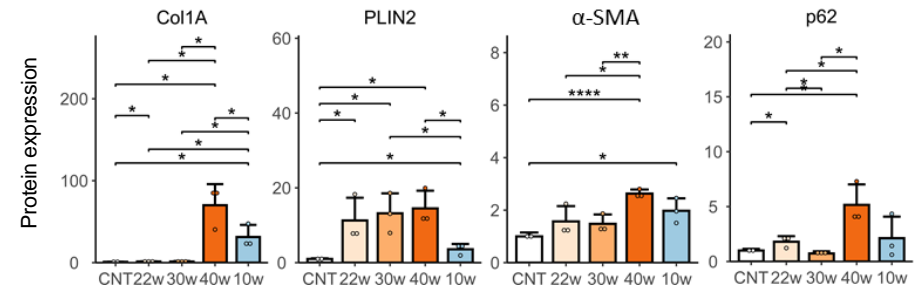**D**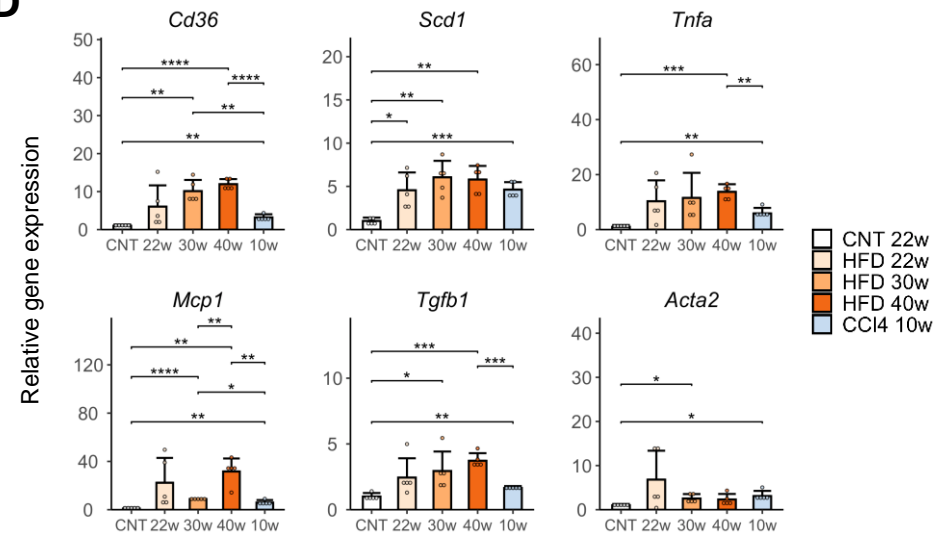

**Fig. 3**

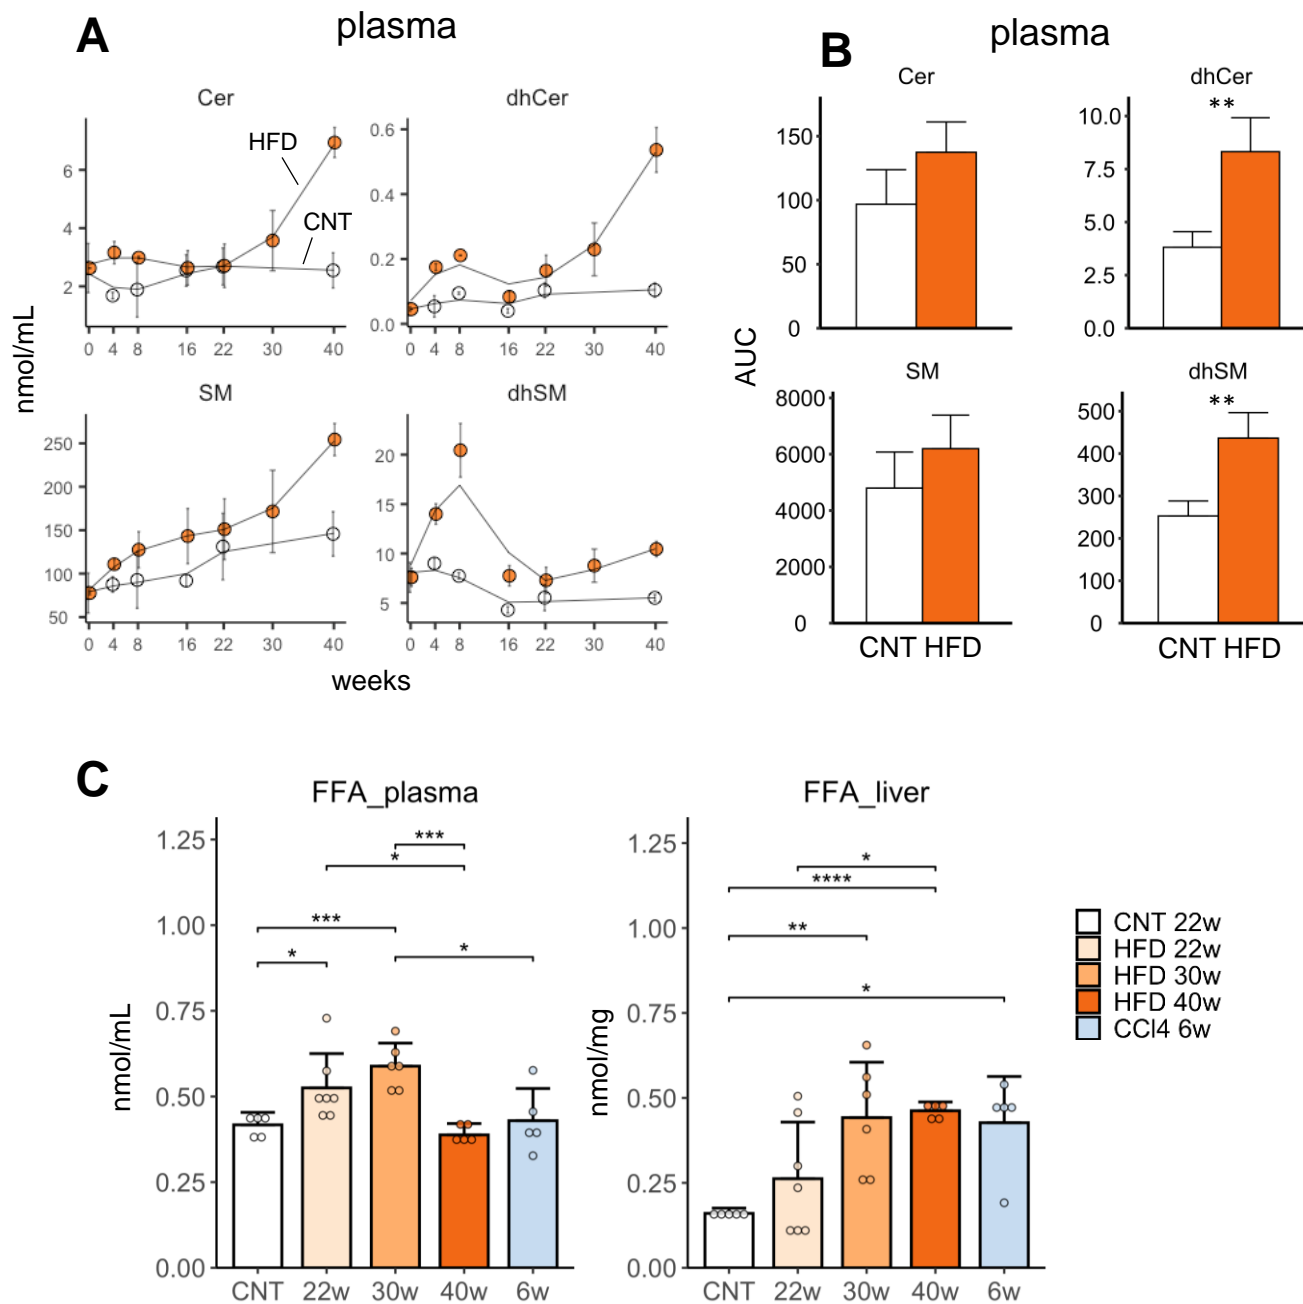

**Fig. 4**

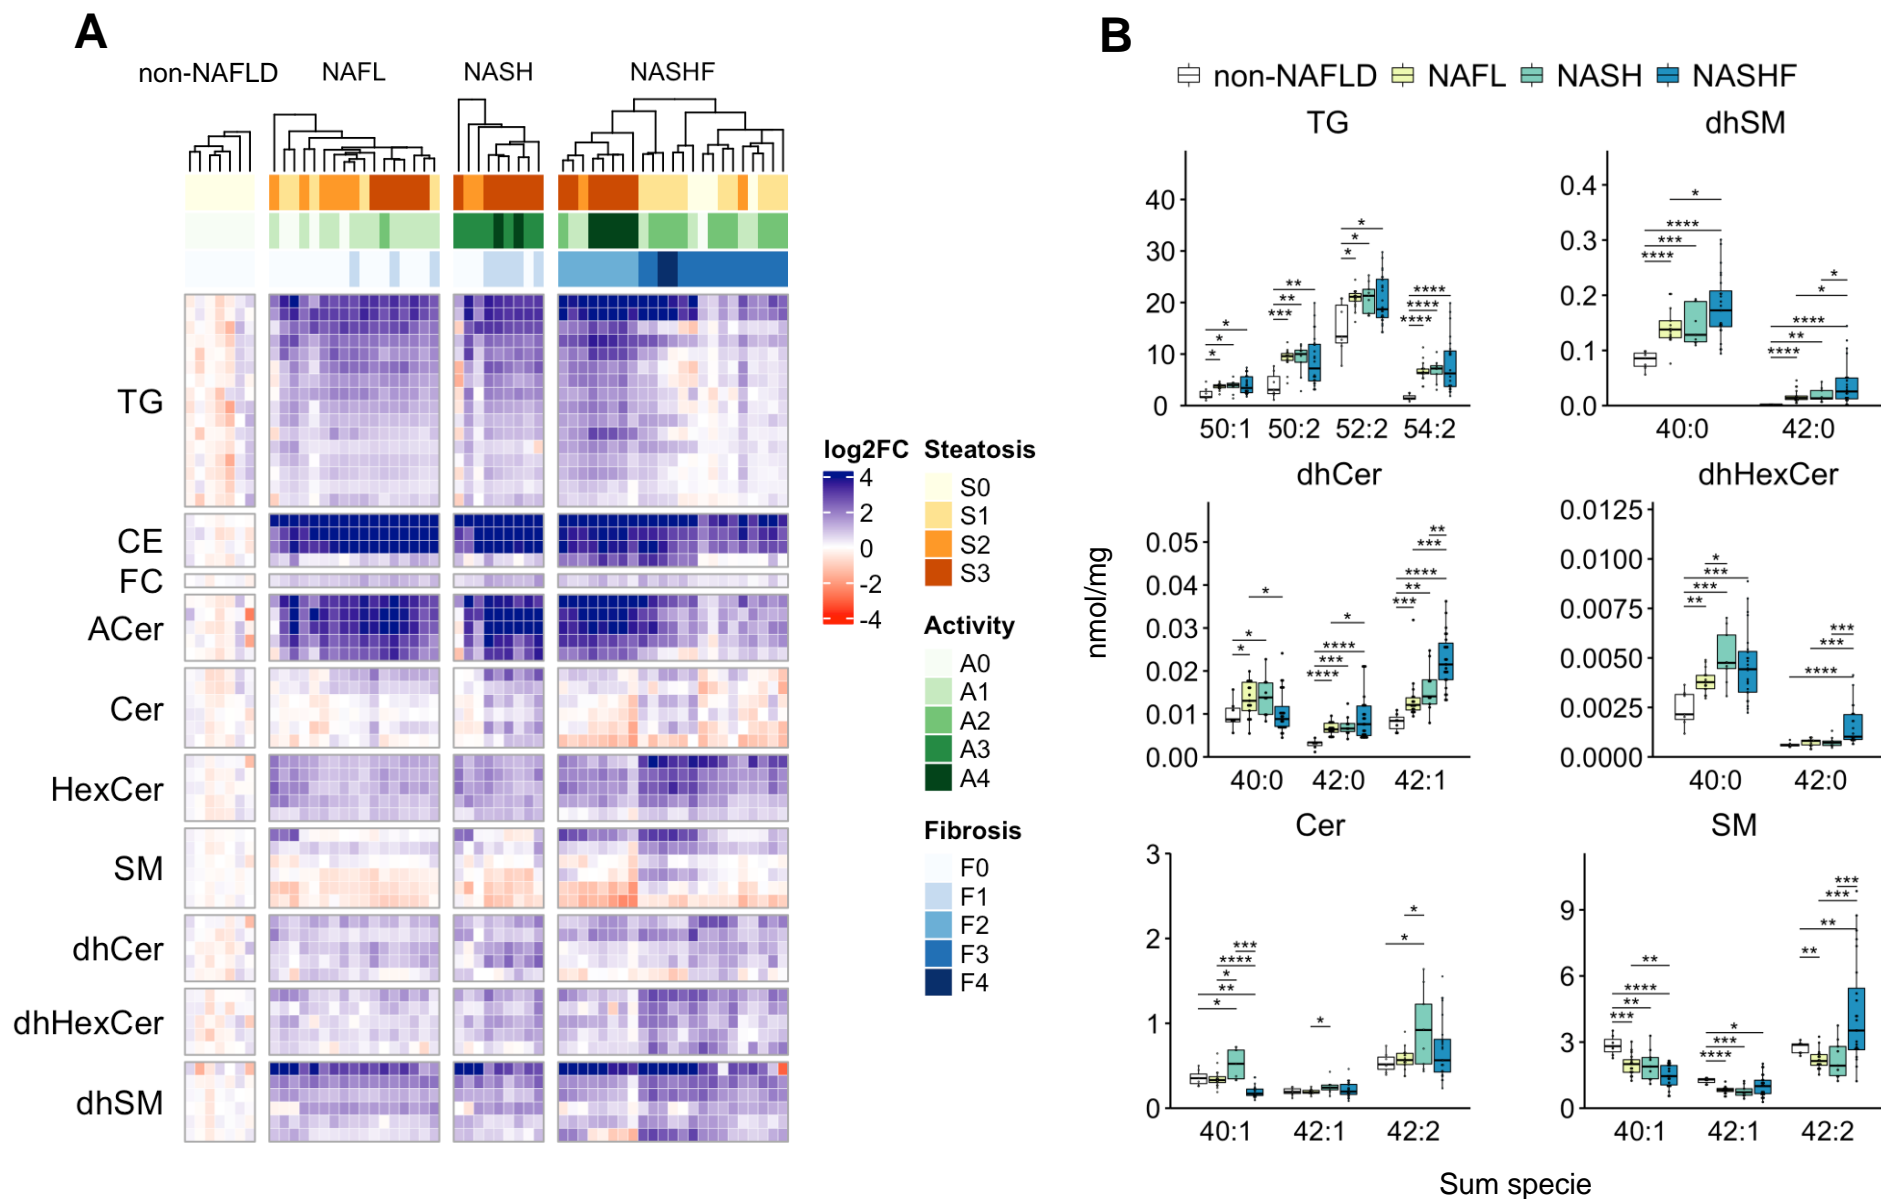

**Fig. 5****A**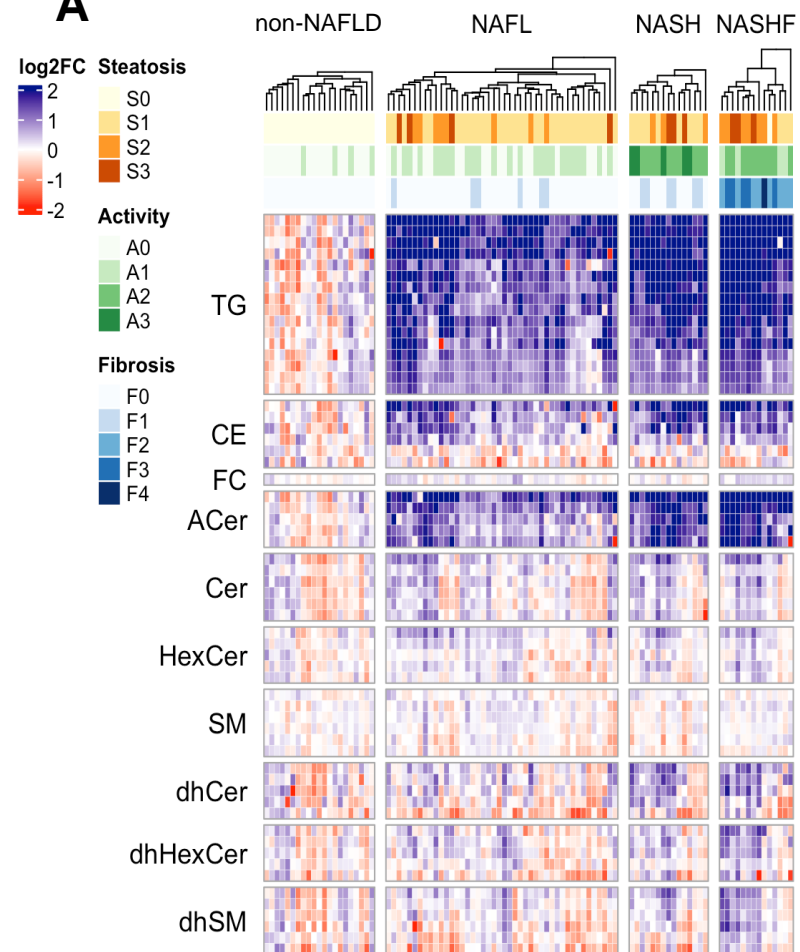**B**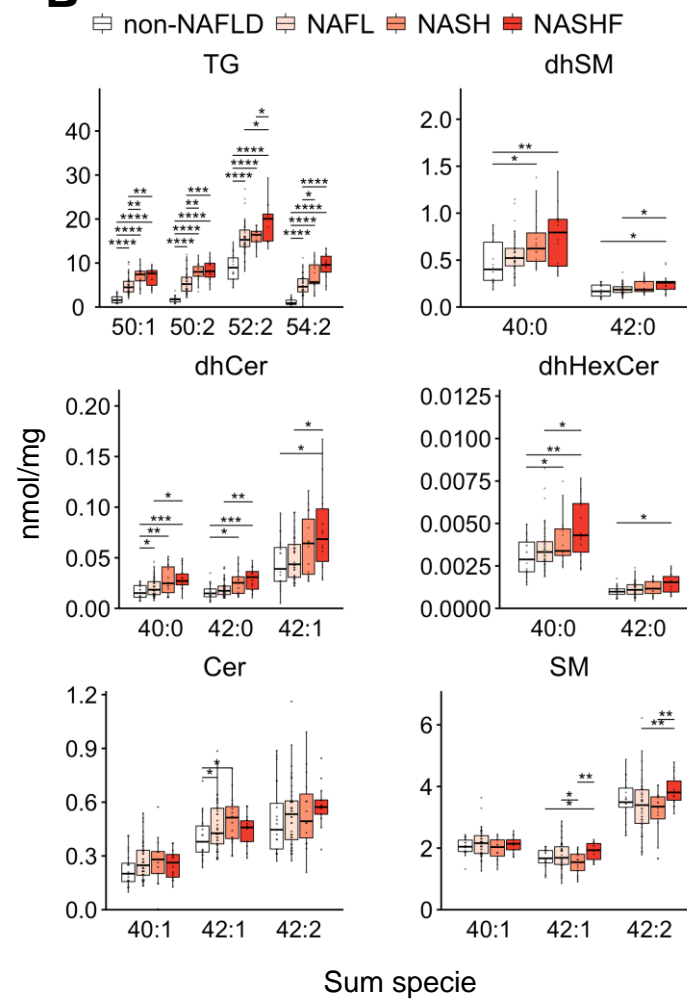**C**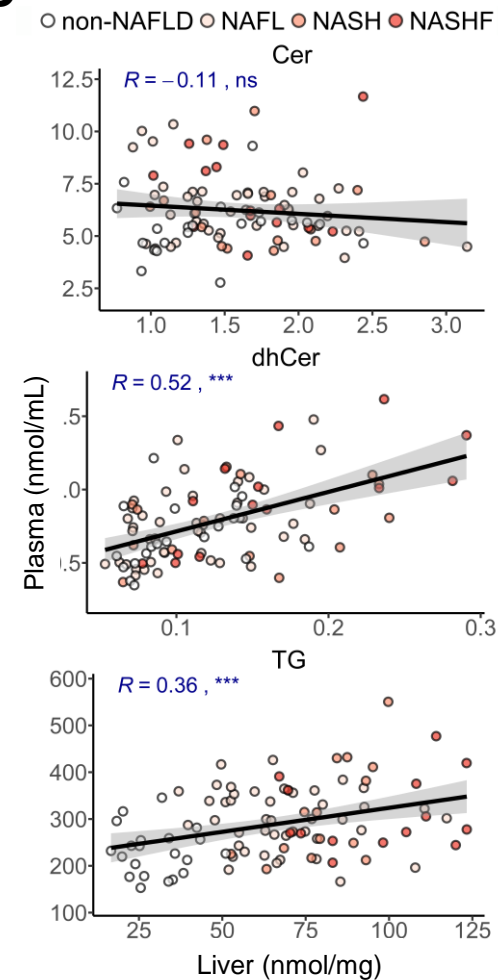



**Fig. 6**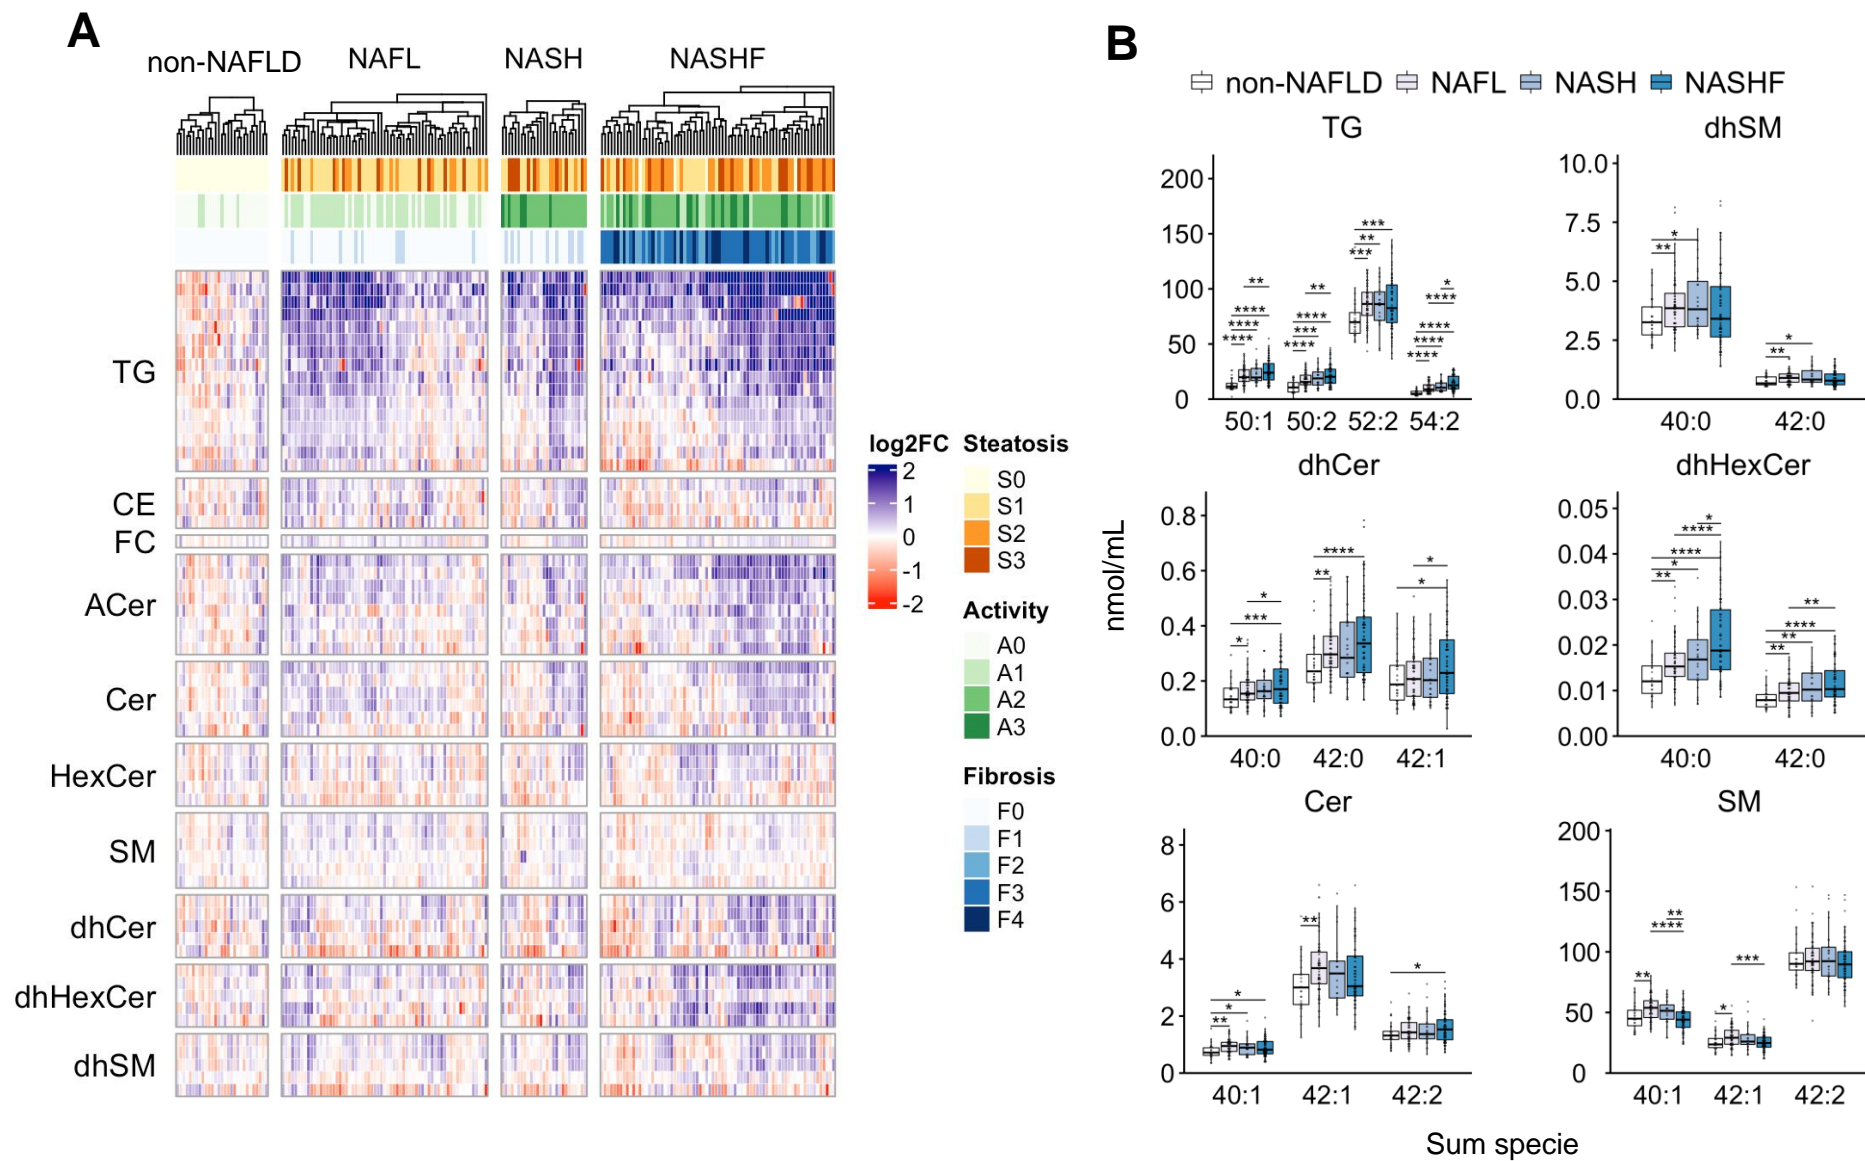

## **Supplementary Figures**

# Suppl. Fig. 1

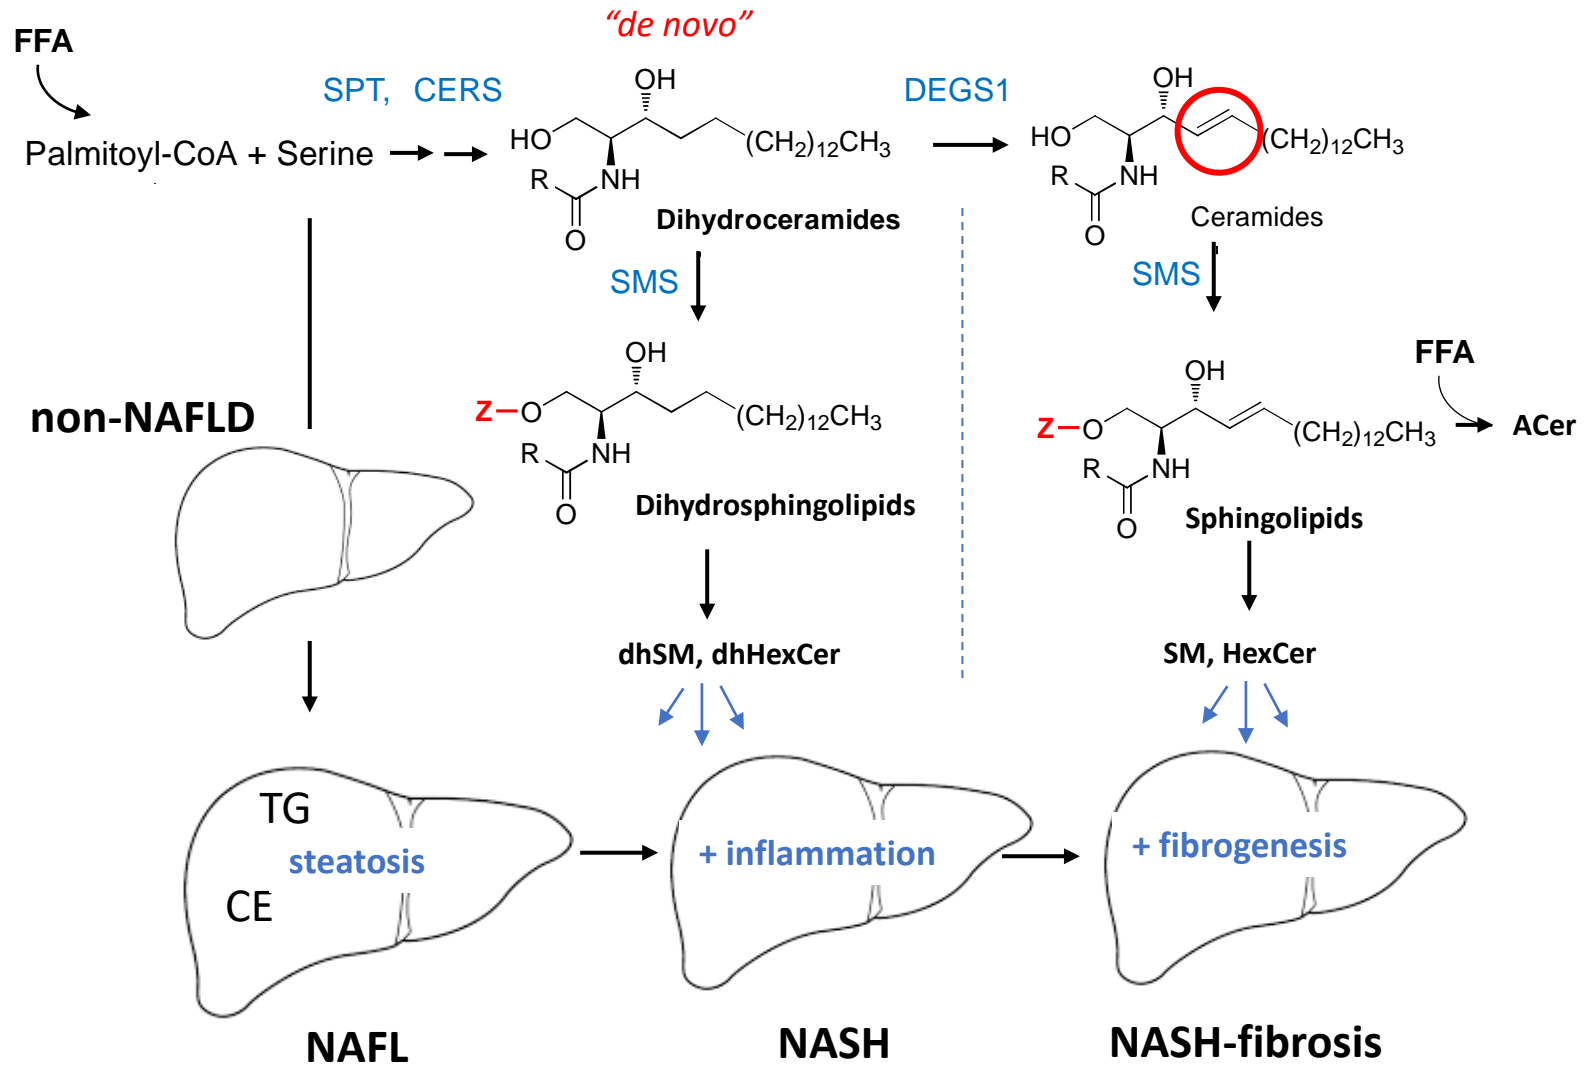

# Suppl. Fig. 2

## Chow diet (CNT)

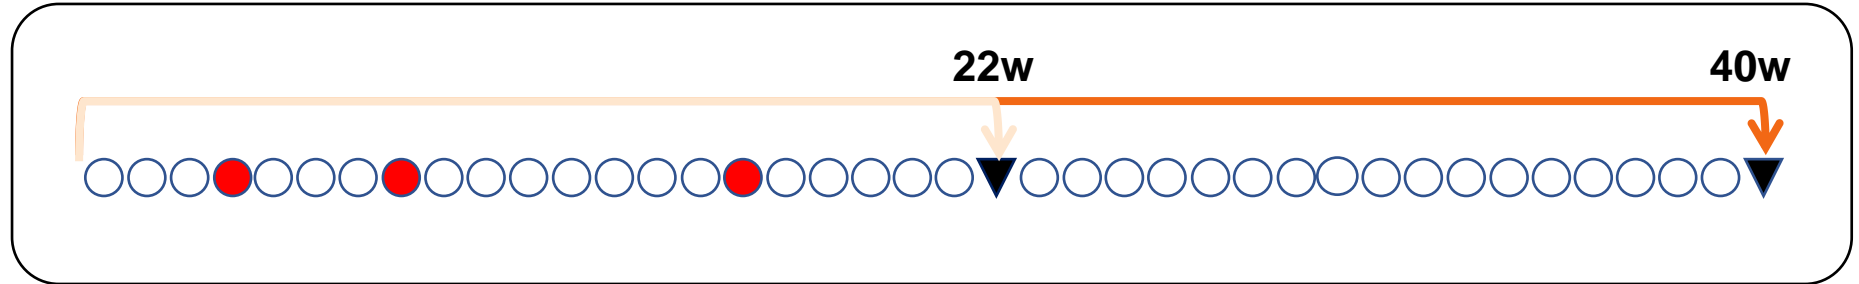

## High Fat Diet (HFD)

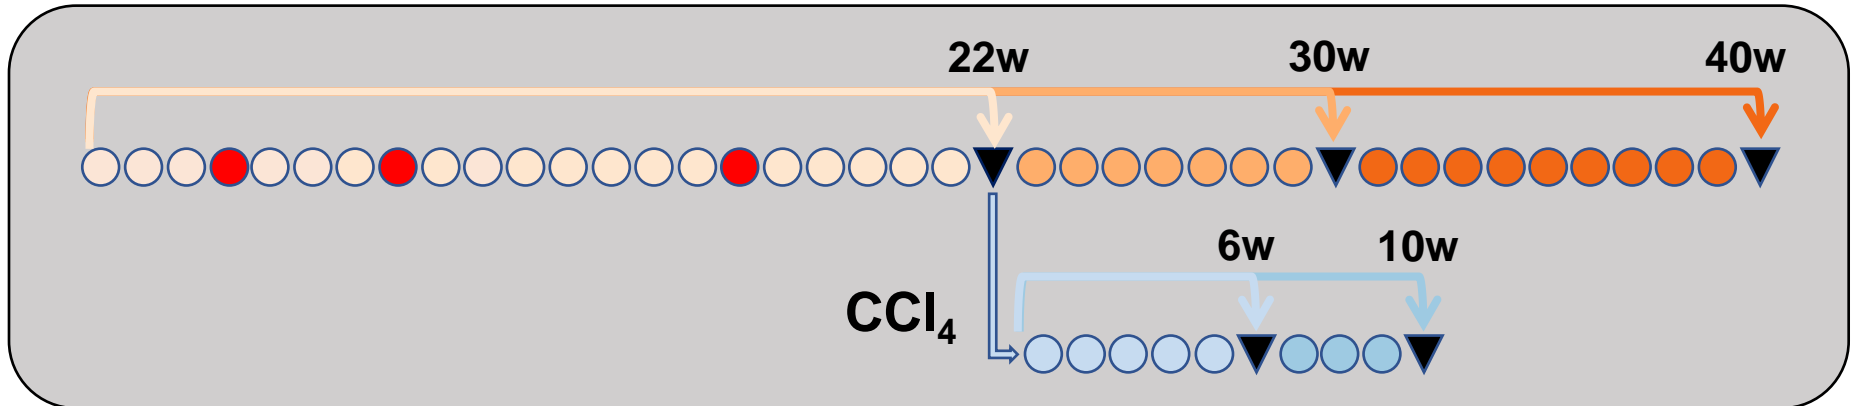

● Plasma sampling

▼ Plasma & tissue sampling



# Suppl. Fig. 3

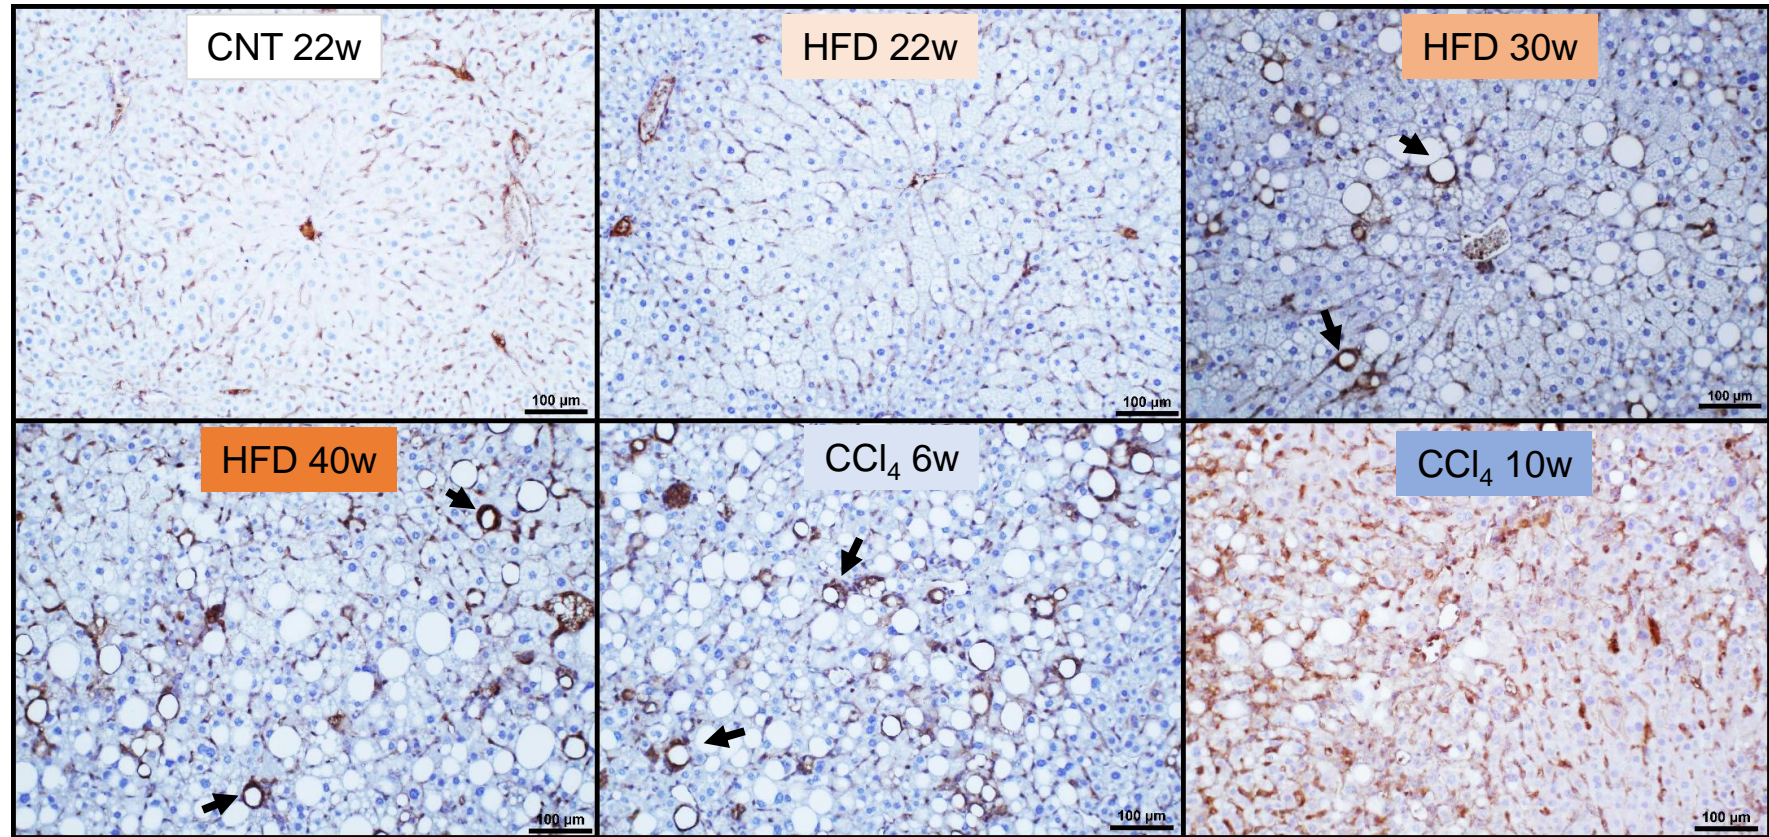

# Suppl. Fig. 4

**A**

| group/score          | Steatosis |    |    |    | Activity |    |    |    |    | Fibrosis |    |    |    |    |
|----------------------|-----------|----|----|----|----------|----|----|----|----|----------|----|----|----|----|
|                      | S0        | S1 | S2 | S3 | A0       | A1 | A2 | A3 | A4 | F0       | F1 | F2 | F3 | F4 |
| CNT 22w              | 7         | NA | NA | NA | 7        | NA | NA | NA | NA | 7        | NA | NA | NA | NA |
| HFD 22w              | NA        | 5  | 8  | 6  | 4        | 11 | 1  | 3  | NA | 16       | 3  | NA | NA | NA |
| HFD 30w              | NA        | NA | NA | 7  | NA       | 1  | NA | 4  | 2  | 2        | 5  | NA | NA | NA |
| HFD 40w              | NA        | NA | NA | 5  | NA       | NA | NA | NA | 5  | NA       | NA | 5  | NA | NA |
| CCl <sub>4</sub> 6w  | NA        | 1  | 2  | 2  | NA       | 2  | 3  | NA | NA | NA       | NA | 3  | 1  | 1  |
| CCl <sub>4</sub> 10w | 4         | 9  | 1  | NA | 1        | 4  | 9  | NA | NA | NA       | NA | NA | 13 | 1  |

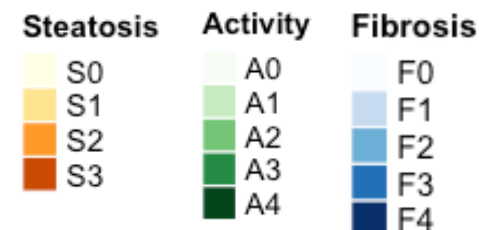

**B**

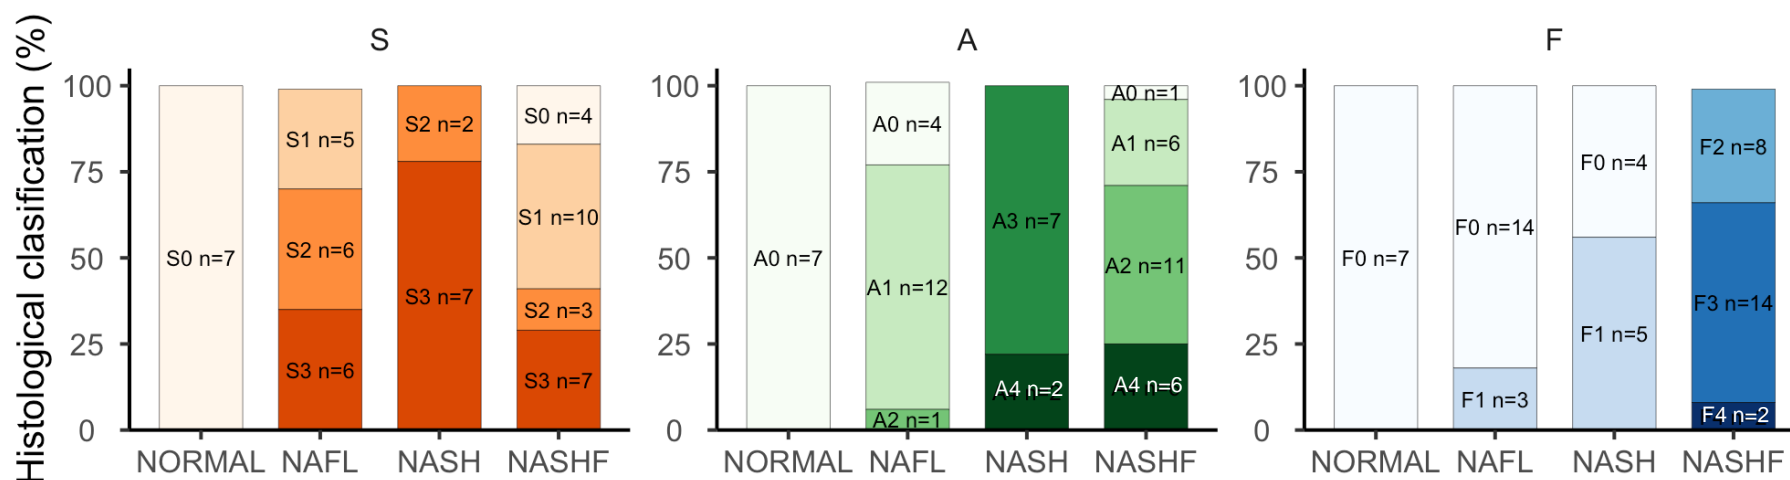

Suppl. Fig. 5

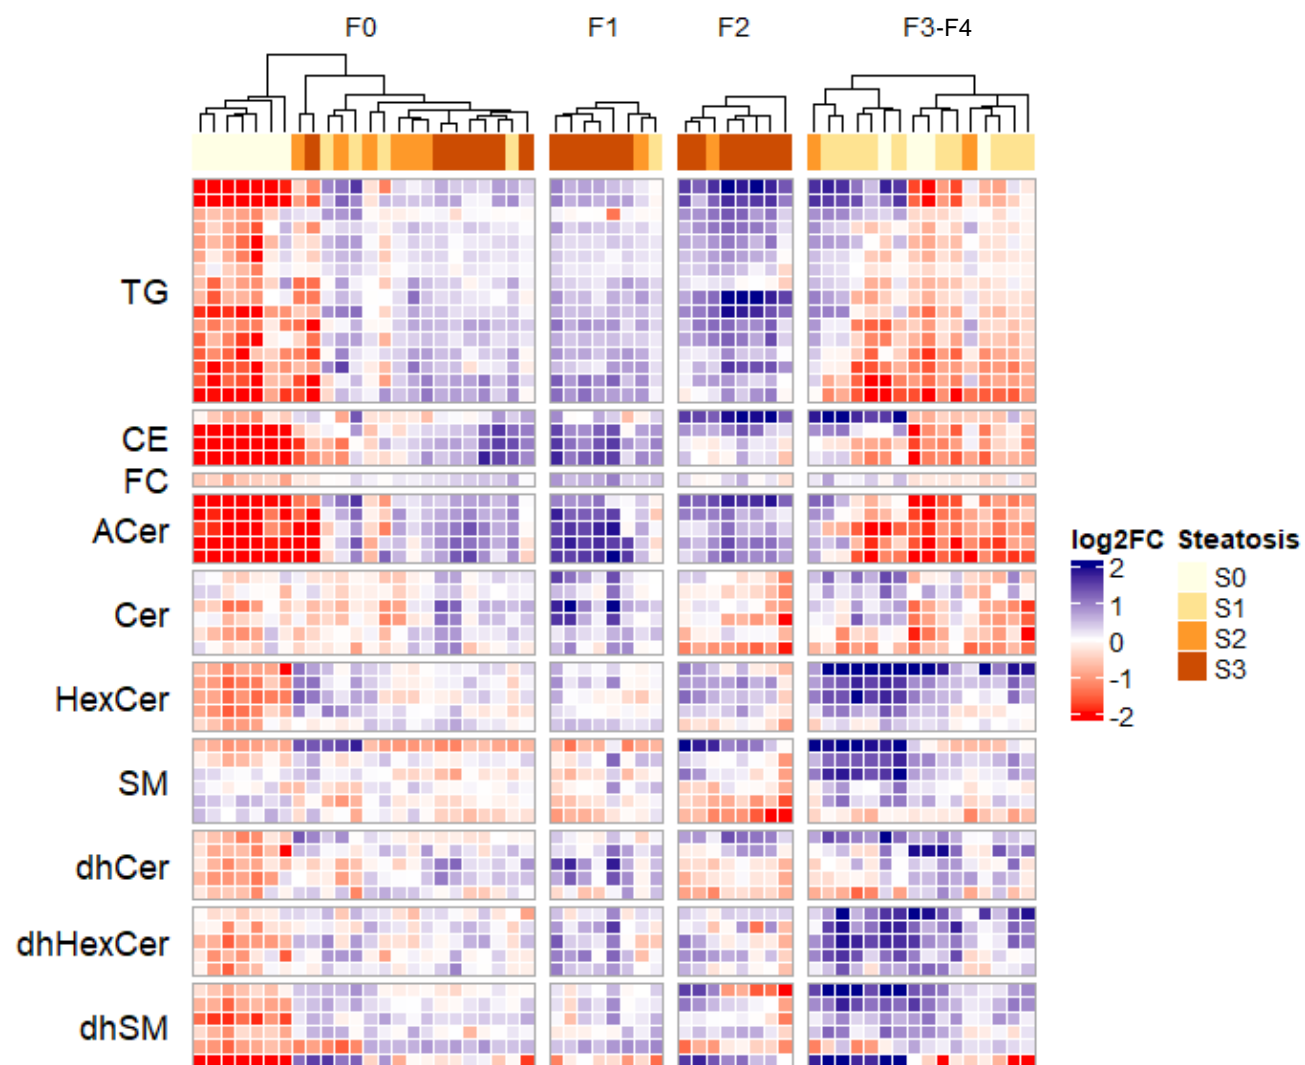

# Suppl. Fig. 6

□ non-NAFLD    ■ NAFL    ■ NASH    ■ NASHF

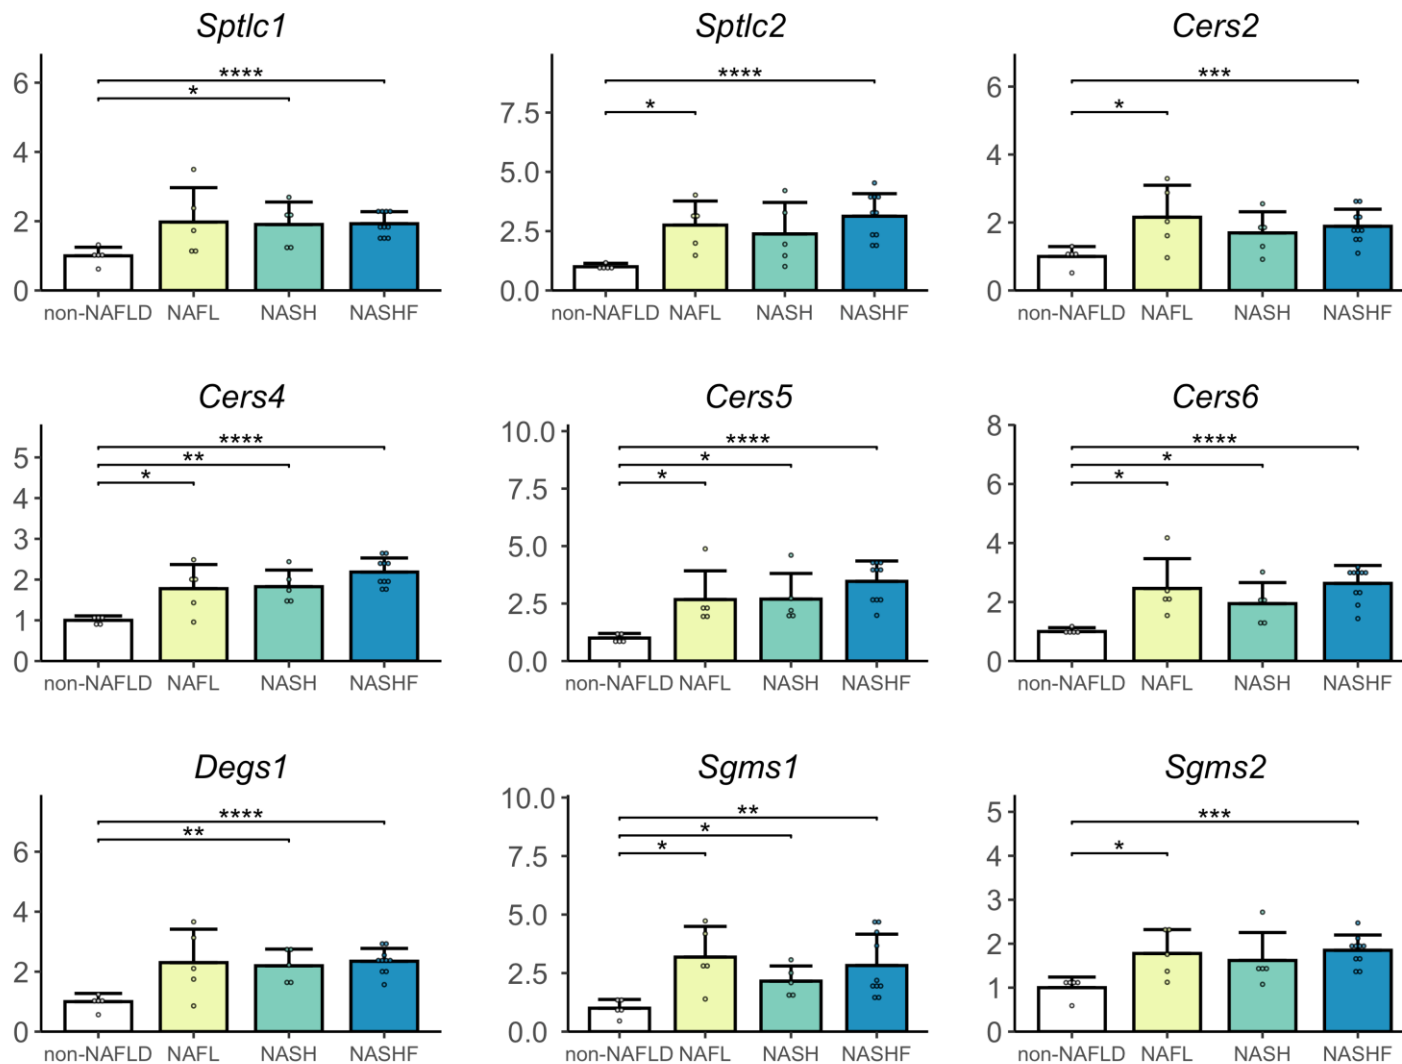

Liver cohort

Plasma cohort

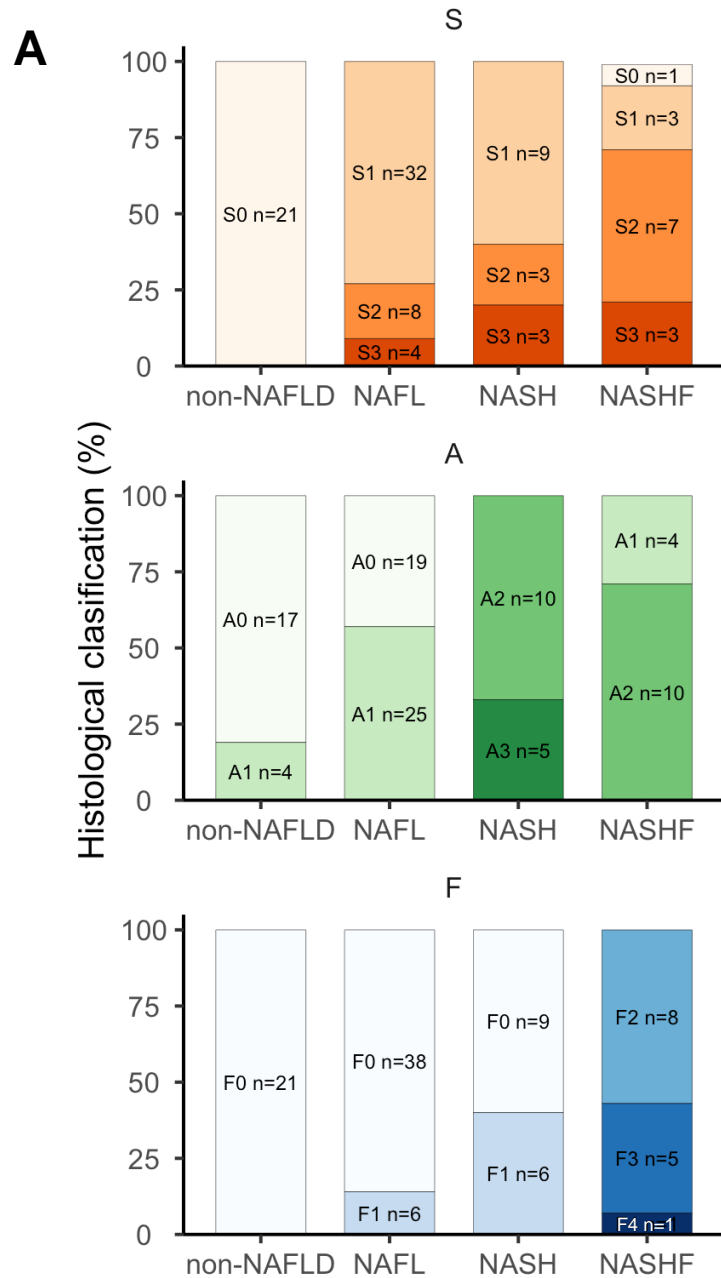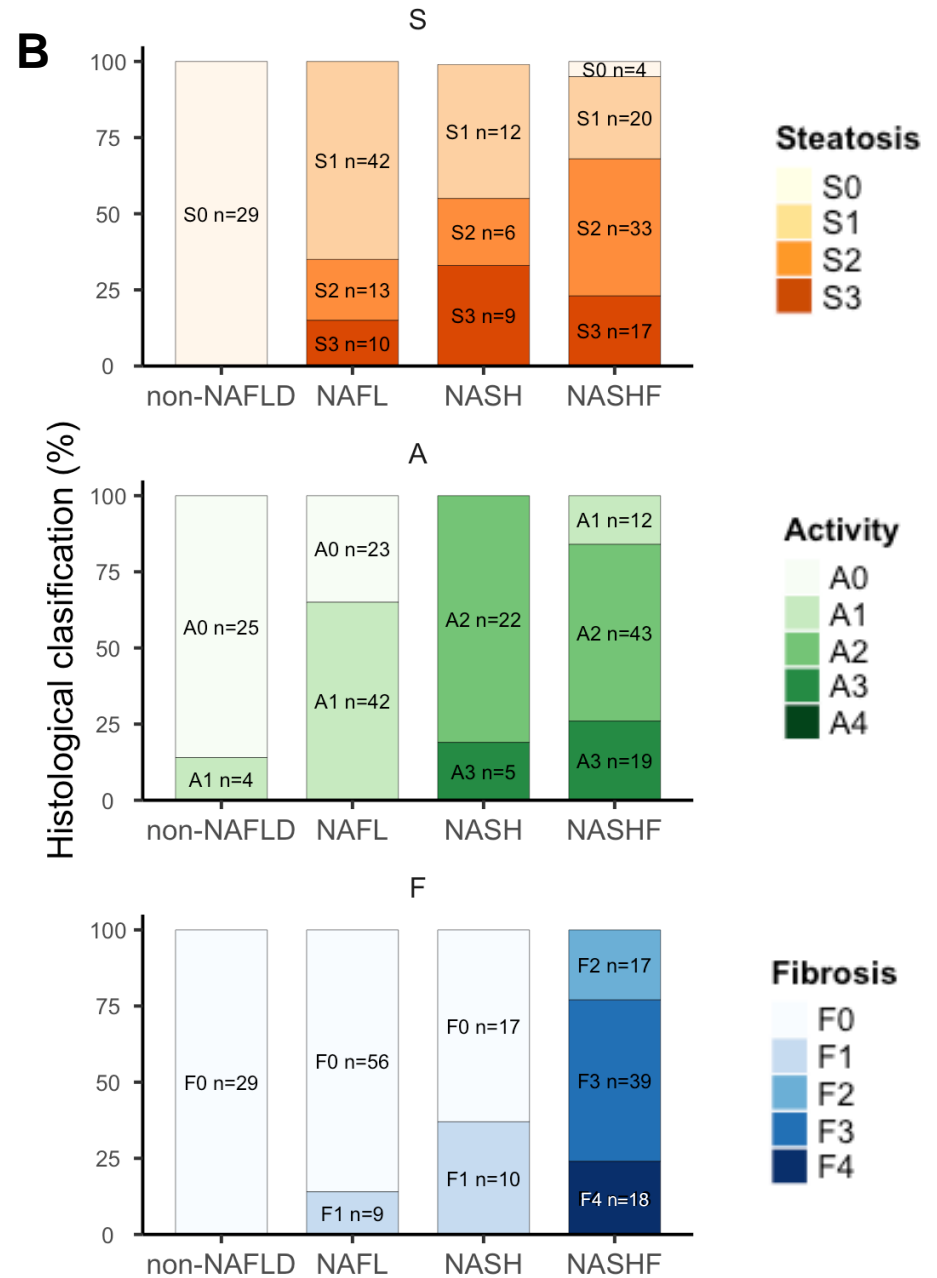



# Suppl.Fig. 8

## A

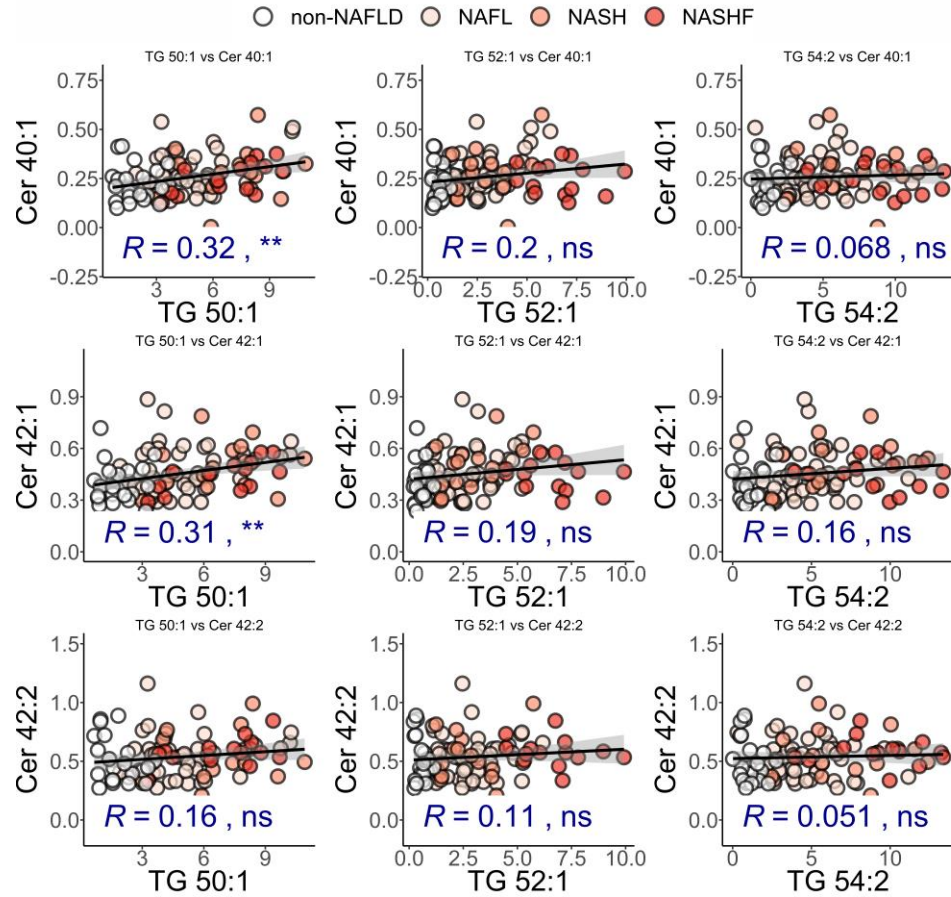

## B

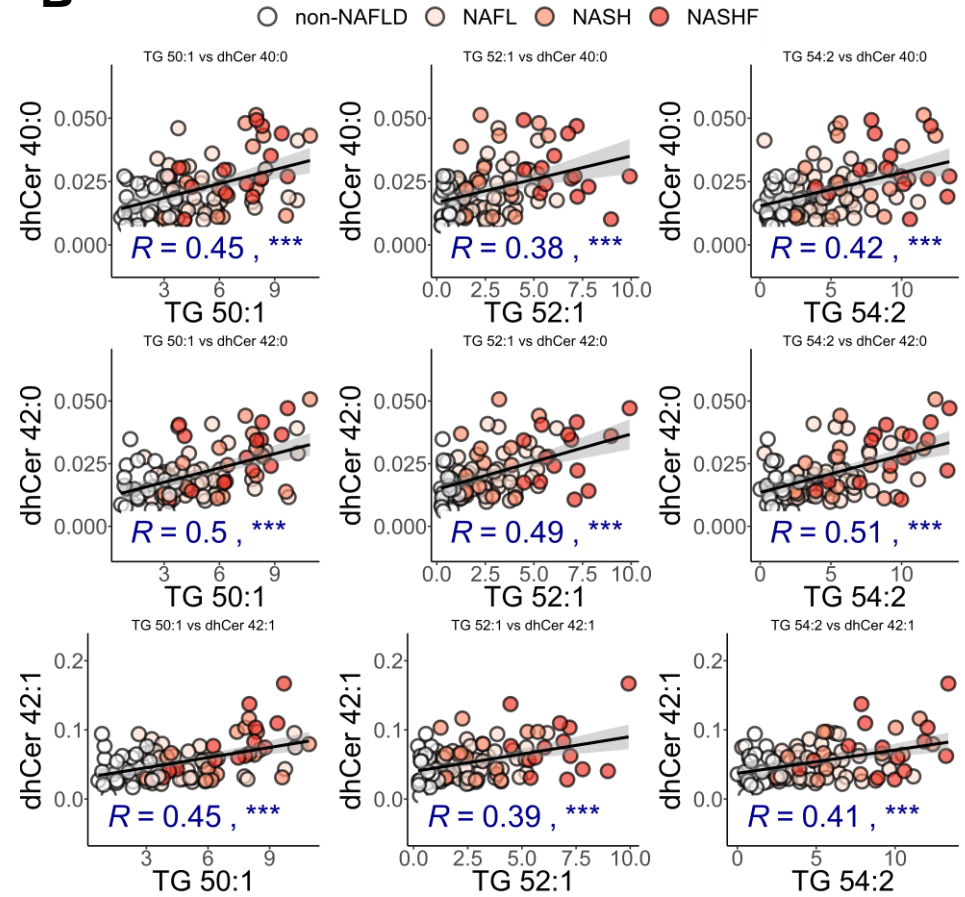

# Suppl. Fig. 9

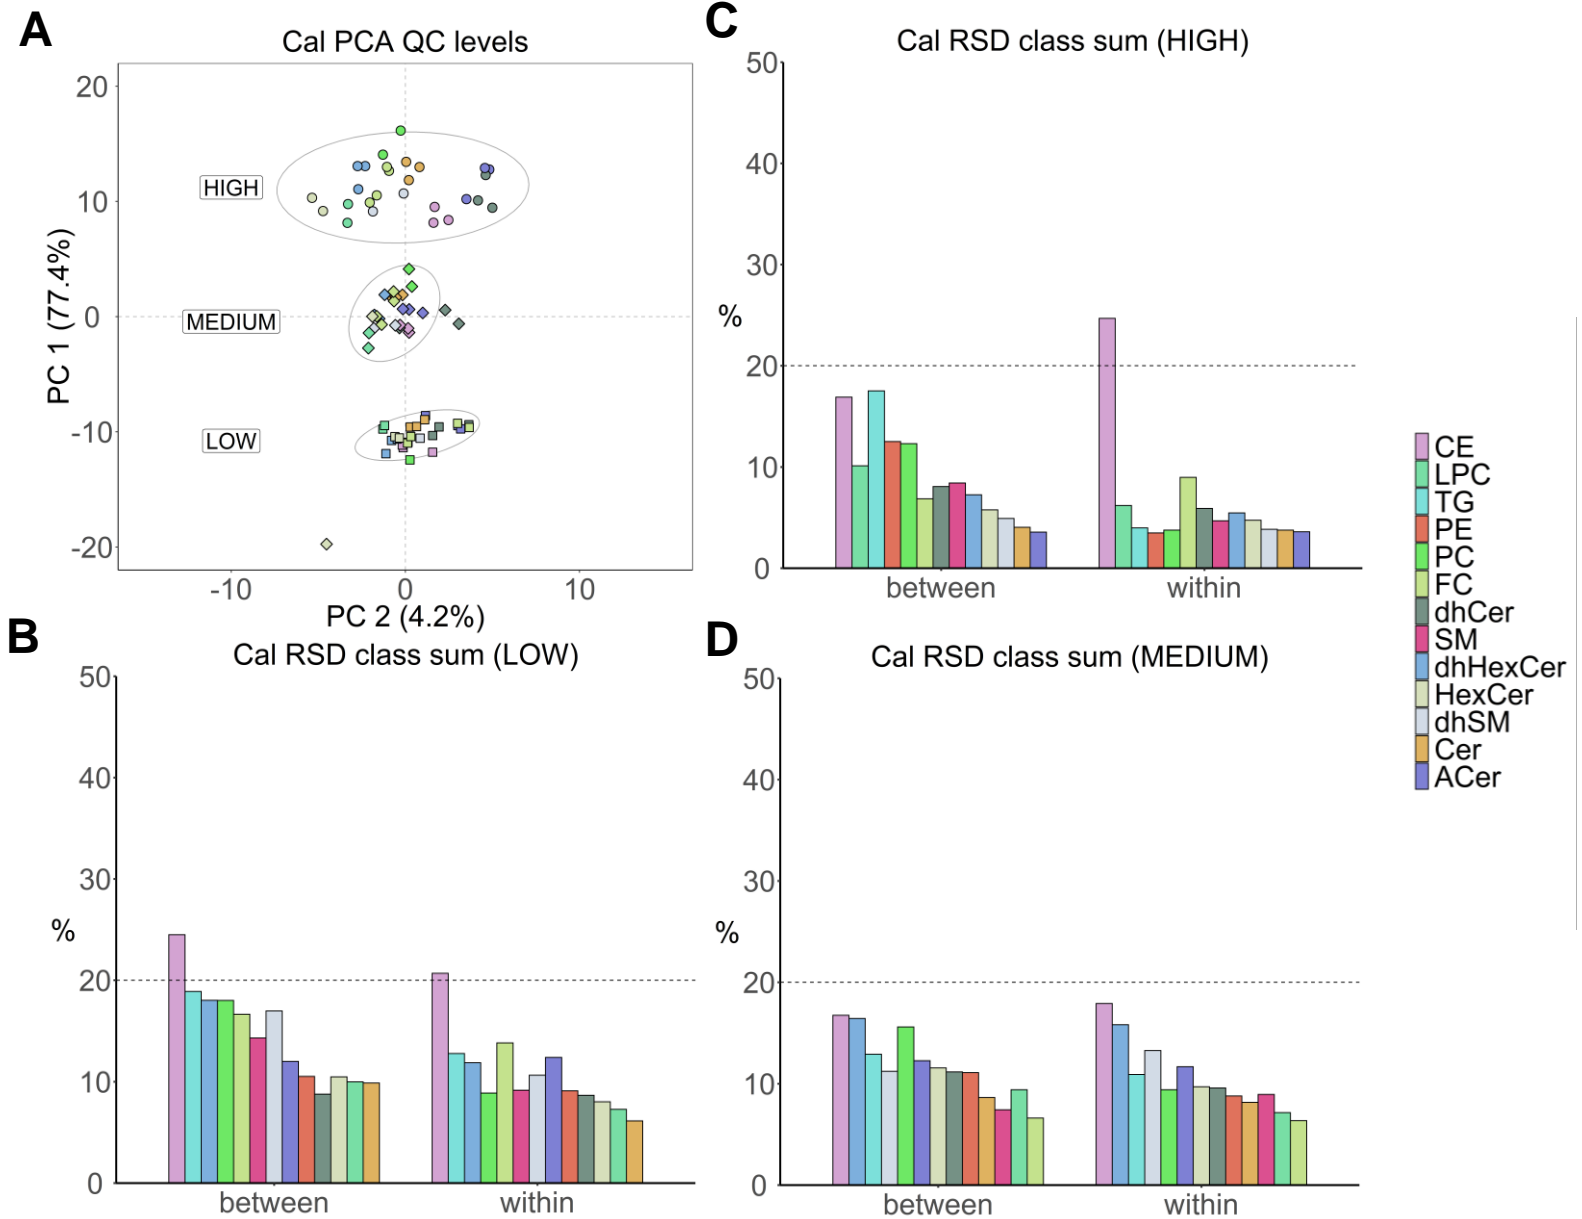

Source: https://medrxiv.org/content/medrxiv/early/2022/03/12/2022.03.10.22271048.full.pdf
