# Supplementary material for: Accumulation of dihydrosphingolipids and neutral lipids is related to steatosis and fibrosis damage in human and animal models of non-alcoholic fatty liver disease
Source: bioRxiv or medRxiv preprint supplement (doi:10.1101/2022.03.10.22271048), 2022-03-12
Supplement: Supplementary file [file media-2.pdf]

**Suppl. Table S1. Macroscopic and biochemical characteristics of mice classified by the SAF score.** Mice were classified according to their liver histological findings, and with independence of their time on diet or administration of CCl<sub>4</sub>, into four groups: non-NAFLD, simple steatosis (NAFL), steatohepatitis without significant fibrosis, stage of fibrosis F0-F1 (NASH) and steatohepatitis + stage of fibrosis F2-F4 (NASH-fibrosis). Values are expressed in mean  $\pm$  SD (N, number of animals). (a) Significant,  $p < 0.05$  from non-NAFLD. (b) Significant,  $p < 0.05$  from NAFL. (c) Significant,  $p < 0.05$  from NASH. (d) Significant,  $p < 0.05$  from NASH-fibrosis. ALT, alanine aminotransferase; AST, aspartate aminotransferase; LW, Liver weight, BW, body weight; HDLc, high-density lipoprotein cholesterol; FFA, free fatty acids.

| <b>Variable</b>                   | <b>non-NAFLD</b>                       | <b>NAFL</b>                           | <b>NASH</b>                           | <b>NASH-fibrosis</b>                     |
|-----------------------------------|----------------------------------------|---------------------------------------|---------------------------------------|------------------------------------------|
| Weight, g                         | 33.7 $\pm$ 0.5 (7) <sup>b,c,d</sup>    | 38.6 $\pm$ 1.1 (17) <sup>a</sup>      | 44.0 $\pm$ 2.7 (9) <sup>a</sup>       | 39.0 $\pm$ 1.8 (24) <sup>a</sup>         |
| Liver weight, g                   | 1.40 $\pm$ 0.04 (7) <sup>b,c,d</sup>   | 1.93 $\pm$ 0.11 (17) <sup>a,c</sup>   | 2.85 $\pm$ 0.36 (9) <sup>a,b</sup>    | 2.38 $\pm$ 0.37 (24) <sup>a</sup>        |
| LW/BW, %                          | 4.03 $\pm$ 0.21 (7) <sup>b,c,d</sup>   | 4.94 $\pm$ 0.20 (17) <sup>a</sup>     | 6.28 $\pm$ 0.53 (9) <sup>a,b</sup>    | 5.53 $\pm$ 0.62 (24) <sup>a</sup>        |
| Glucose, mg/dL                    | 149.9 $\pm$ 8.6 (7) <sup>b,c</sup>     | 196.1 $\pm$ 8.7 (17) <sup>a,c,d</sup> | 232.2 $\pm$ 11.4 (9) <sup>a,b,d</sup> | 165.6 $\pm$ 6.6 (24) <sup>b,c</sup>      |
| ALT, IU/mL                        | 17.1 $\pm$ 1.1 (7) <sup>b,c,d</sup>    | 87.5 $\pm$ 24.3 (17) <sup>a</sup>     | 108.8 $\pm$ 24.0 (9) <sup>a</sup>     | 151.2 $\pm$ 31.7 (24)                    |
| AST, IU/mL                        | 83.86 $\pm$ 9.32 (7) <sup>c,d</sup>    | 117.59 $\pm$ 17.56 (17) <sup>c</sup>  | 137.75 $\pm$ 14.83 (9) <sup>a</sup>   | 236.67 $\pm$ 34.22 (24) <sup>a,b,c</sup> |
| Triglycerides, mg/dL              | 67.3 $\pm$ 9.4 (7) <sup>b,d</sup>      | 37.41 $\pm$ 2.09 (17) <sup>a,d</sup>  | 47.75 $\pm$ 6.15 (9) <sup>d</sup>     | 31.12 $\pm$ 1.55 (24) <sup>a,b,c</sup>   |
| Cholesterol, mg/dL                | 88.7 $\pm$ 9.7 (7) <sup>b,c,d</sup>    | 131.8 $\pm$ 6.8 (17) <sup>a</sup>     | 150.4 $\pm$ 12.3 (9) <sup>a</sup>     | 129.3 $\pm$ 15.8 (24) <sup>a</sup>       |
| HDLc, mg/dL                       | 53.4 $\pm$ 5.79 (7) <sup>b,c</sup>     | 72.1 $\pm$ 3.6 (16) <sup>a,d</sup>    | 78.5 $\pm$ 5.3 (9) <sup>a,d</sup>     | 57.4 $\pm$ 4.9 (24) <sup>b,c</sup>       |
| Protein, g/dL                     | 3.46 $\pm$ 0.30 (7) <sup>b,c,d</sup>   | 4.13 $\pm$ 0.07 (15) <sup>a,d</sup>   | 4.61 $\pm$ 0.13 (9) <sup>a,d</sup>    | 4.19 $\pm$ 0.11 (24) <sup>a,b,c</sup>    |
| Urea, mg/dL                       | 25.7 $\pm$ 2.0 (7) <sup>b,c,d</sup>    | 38.0 $\pm$ 1.6 (17) <sup>a</sup>      | 33.6 $\pm$ 2.7 (9) <sup>a</sup>       | 36.8 $\pm$ 1.0 (24) <sup>a</sup>         |
| FFA, nmol/mL                      | 0.42 $\pm$ 0.02 (5) <sup>b,c</sup>     | 0.54 $\pm$ 0.04 (7) <sup>a,d</sup>    | 0.57 $\pm$ 0.03 (6) <sup>a,d</sup>    | 0.41 $\pm$ 0.02 (10) <sup>b,c</sup>      |
| <b><i>Liver lipid classes</i></b> |                                        |                                       |                                       |                                          |
| TG, nmol/mg                       | 49.7 $\pm$ 8.6 (7) <sup>b,c,d</sup>    | 94.7 $\pm$ 4.7 (17) <sup>a</sup>      | 95.1 $\pm$ 8.9 (9) <sup>a</sup>       | 98.4 $\pm$ 8.5 (24) <sup>a</sup>         |
| CE, nmol/mg                       | 7.7 $\pm$ 0.5 (7) <sup>b,c,d</sup>     | 224.5 $\pm$ 24.6 (17) <sup>a</sup>    | 241.7 $\pm$ 36.8 (9) <sup>a</sup>     | 167.8 $\pm$ 18.4 (24) <sup>a,b</sup>     |
| FC, nmol/mg                       | 38.3 $\pm$ 2.2 (7) <sup>b,c,d</sup>    | 71.9 $\pm$ 3.1 (17) <sup>a,d</sup>    | 79.1 $\pm$ 7.5 (9) <sup>a</sup>       | 61.5 $\pm$ 3.1 (24) <sup>a,b,c</sup>     |
| ACer, nmol/mg                     | 0.005 $\pm$ 0.001 (7)                  | 0.043 $\pm$ 0.005 (17)                | 0.05 $\pm$ 0.009 (9)                  | 0.04 $\pm$ 0.006 (24)                    |
| Cer, nmol/mg                      | 1.21 $\pm$ 0.11 (7) <sup>c</sup>       | 1.30 $\pm$ 0.08 (17) <sup>c,d</sup>   | 1.95 $\pm$ 0.28 (9) <sup>a,b</sup>    | 1.24 $\pm$ 0.12 (24) <sup>c</sup>        |
| HexCer, nmol/mg                   | 0.29 $\pm$ 0.03 (7) <sup>b,c,d</sup>   | 0.67 $\pm$ 0.05 (17) <sup>a</sup>     | 0.73 $\pm$ 0.06 (9) <sup>a</sup>      | 1.04 $\pm$ 0.10 (24) <sup>a</sup>        |
| SM, nmol/mg                       | 8.56 $\pm$ 0.41 (7) <sup>d</sup>       | 7.79 $\pm$ 0.82 (17) <sup>d</sup>     | 7.98 $\pm$ 1.41 (9) <sup>d</sup>      | 13.01 $\pm$ 1.50 (24) <sup>a,b,c</sup>   |
| dhCer, nmol/mg                    | 0.024 $\pm$ 0.003 (7) <sup>a,b,c</sup> | 0.039 $\pm$ 0.003 (17) <sup>a,d</sup> | 0.046 $\pm$ 0.006 (9) <sup>a</sup>    | 0.049 $\pm$ 0.005 (24) <sup>a,b</sup>    |
| dhHexCer, nmol/mg                 | 0.005 $\pm$ 0.001 (7) <sup>a,b,c</sup> | 0.008 $\pm$ 0.001 (17) <sup>a,d</sup> | 0.010 $\pm$ 0.001 (9) <sup>a</sup>    | 0.012 $\pm$ 0.001 (24) <sup>a,b</sup>    |
| dhSM, nmol/mg                     | 0.36 $\pm$ 0.02 (7) <sup>a,b,c</sup>   | 0.78 $\pm$ 0.04 (17) <sup>a,d</sup>   | 0.79 $\pm$ 0.08 (9) <sup>a,d</sup>    | 1.10 $\pm$ 0.11 (24) <sup>a,b,c</sup>    |
| LPC, nmol/mg                      | 3.33 $\pm$ 0.43 (7) <sup>c</sup>       | 2.71 $\pm$ 0.22 (17)                  | 2.16 $\pm$ 0.29 (9) <sup>a,d</sup>    | 2.99 $\pm$ 0.26 (24) <sup>c</sup>        |
| PC, nmol/mg                       | 88.1 $\pm$ 3.8 (7) <sup>b,d</sup>      | 74.4 $\pm$ 5.3 (17) <sup>a</sup>      | 74.4 $\pm$ 7.9 (9)                    | 64.8 $\pm$ 7.9 (24) <sup>a</sup>         |
| PE, nmol/mg                       | 62.1 $\pm$ 3.0 (7) <sup>b,c,d</sup>    | 43.9 $\pm$ 2.3 (17) <sup>a</sup>      | 44.6 $\pm$ 3.8 (9) <sup>a</sup>       | 50.5 $\pm$ 4.7 (24) <sup>a</sup>         |
| FFA, nmol/mg                      | 0.16 $\pm$ 0.01 (5) <sup>c,d</sup>     | 0.22 $\pm$ 0.05 (7) <sup>c,d</sup>    | 0.49 $\pm$ 0.05 (6) <sup>a,b</sup>    | 0.44 $\pm$ 0.03 (10) <sup>a,b</sup>      |
